# Supplementary material for: Diversity, taxonomy, and evolution of archaeal viruses of the class Caudoviricetes
Source: PLoS Biol. 2021 Nov 9;19(11):e3001442. doi: 10.1371/journal.pbio.3001442 (PMC8651126; doi:10.1371/journal.pbio.3001442)
Supplement: S1 Table — arTV, archaeal tailed virus. (XLSX) [file pbio.3001442.s004.xlsx]

## Sheet: S1_Table
S1 Table Properties of archaeal tailed viruses
family (F)	family name interpretation	genus	genus name interpretation	species	virus isolate	virus abbreviation	virus origin	reference for virus	morphotype	isolation host	host used in this study*	reference for host used in this study	genome length (bp)	no. tRNA genes	genome type, lenght of the DTR	accession number
Hafunaviridae (F1)	After HF1 virus, the first representative of the family	Haloferacalesvirus	Referring to the Order of the main hosts, Haloferacales, of viruses in the genus	species	Halorubrum head-tail virus 8	HRTV-8	solar saltern, Samut Sakhon, Thailand	PMID: 23470522	myovirus	Halorubrum sp. B2-2	Halorubrum sp. B2-2	PMID: 22003883	74519	4	DTR, 346 bp	KC292020
					Halorubrum tailed virus 14	HRTV-14	solar saltern, Samut Sakhon, Thailand	PMID: 25866903	myovirus	Halorubrum sp. SS6-2	Halorubrum sp. SS10-9	PMID: 25866903	74355	4	DTR, 340 bp	MZ334492
					Halorubrum tailed virus 17	HRTV-17	solar saltern, Samut Sakhon, Thailand	PMID: 25866903	myovirus	Halorubrum sp. SS9-12	Halobacterium sp. SS6-4	PMID: 25866903	74754	4	DTR, 340 bp	MZ334493
					Halorubrum tailed virus 19	HRTV-19	solar saltern, Samut Sakhon, Thailand	PMID: 25866903	myovirus	Halorubrum sp. SS10-3	Halorubrum sp. SS10-3	PMID: 25866903	77739	4	DTR, 319 bp	MZ334494
					Halorubrum tailed virus 23	HRTV-23	solar saltern, Samut Sakhon, Thailand	PMID: 25866903	myovirus	Halorubrum sp. SS10-9	Halorubrum sp. SS10-9	PMID: 25866903	77739	4	DTR, 319 bp	MZ334495
				species	Halorubrum head-tail virus 10	HRTV-10	solar saltern, Eilat, Israel	PMID: 22003883	myovirus	Halorubrum sp. B2-2	Halorubrum sp. B2-2	PMID: 22003883	76759	4	DTR, 316 bp	MZ334496
					Halorubrum tailed virus 18	HRTV-18	solar saltern, Samut Sakhon, Thailand	PMID: 25866903	myovirus	Halorubrum sp. SS10-3	Halorubrum sp. SS10-3	PMID: 25866903	76361	4	DTR, 315 bp	MZ334497
					Halorubrum tailed virus 20	HRTV-20	solar saltern, Samut Sakhon, Thailand	PMID: 25866903	myovirus	Halorubrum sp. SS10-9	Halorubrum sp. SS10-9	PMID: 25866903	76259	4	DTR, 264 bp	MZ334498
					Halorubrum tailed virus 22	HRTV-22	solar saltern, Samut Sakhon, Thailand	PMID: 25866903	myovirus	Halorubrum sp. SS10-9	Halorubrum sp. SS10-9	PMID: 25866903	76812	4	DTR, 323 bp	MZ334499
					Halorubrum tailed virus 26	HRTV-26	solar saltern, Samut Sakhon, Thailand	PMID: 25866903	myovirus	Halorubrum sp. SS13-13	Halorubrum sp. SS10-9	PMID: 25866903	77578	4	DTR, 319 bp	MZ334500
				species	Halorubrum sodomense tailed virus 4	HSTV-4	solar saltern, Samut Sakhon, Thailand	PMID: 25866903	myovirus	Halorubrum sodomense	Halorubrum sp. SP3-3	PMID: 22003883	75181	3	DTR, 315 bp	MZ334501
				species	Halorubrum head-tail virus 5	HRTV-5	solar saltern, Margherita di Savoia, Italy	PMID: 23470522	myovirus	Halorubrum sp. s5a-3	Halorubrum sp. s5a-3	PMID: 22003883	76134	4	DTR, 271 bp	KC292022
					Haloarcula californiae tailed virus 7 (12)	HCTV-7 (HCTV-12)	solar saltern, Samut Sakhon, Thailand	PMID: 25866903	myovirus	Haloarcula californiae	Har. californiae for HCTV-7 and Haloterrigena sp. SS13-7 for HCTV-12	PMID: 25866903	76008	4	DTR, 229 bp	MZ334502
					Haloarcula californiae tailed virus 9	HCTV-9	solar saltern, Samut Sakhon, Thailand	PMID: 25866903	myovirus	Haloarcula californiae	Halorubrum sp. SS8-2	PMID: 25866903	76008	4	DTR, 229 bp	MZ334503
					Haloarcula californiae tailed virus 11	HCTV-11	solar saltern, Samut Sakhon, Thailand	PMID: 25866903	myovirus	Haloarcula californiae	Haloarcula californiae	PMID: 25866903	76008	4	DTR, 229 bp	MZ334504
					Halorubrum head-tail virus 9	HRTV-9	solar saltern, Eilat, Israel	PMID: 22003883	myovirus	Halorubrum sp. B2-2	Halorubrum sp. B2-2	PMID: 22003883	75429	4	DTR, 274 bp	MZ334505
					Halorubrum tailed virus 16	HRTV-16	solar saltern, Samut Sakhon, Thailand	PMID: 25866903	myovirus	Halorubrum sp. SS6-2	Haloterrigena sp. SS13-7	PMID: 25866903	77109	4	DTR, 284 bp	MZ334506
					Haloarcula californiae tailed virus 8	HCTV-8	solar saltern, Samut Sakhon, Thailand	PMID: 25866903	myovirus	Haloarcula californiae	Haloarcula californiae	PMID: 25866903	75019	4	DTR, 229 bp	MZ334507
					Haloarcula californiae tailed virus 10	HCTV-10	solar saltern, Samut Sakhon, Thailand	PMID: 25866903	myovirus	Haloarcula californiae	Halorubrum sodomense	doi.org/10.1099/00207713-33-2-381	75019	4	DTR, 229 bp	MZ334508
					Haloarcula japonica head-tail virus 1	HJTV-1	solar saltern, Margherita di Savoia, Italy	PMID: 22003883	myovirus	Haloarcula japonica	Haloarcula japonica	doi.org/10.1016/S0723-2020(11)80165-7	78012	4	DTR, 320 bp	MZ334509
					Halorubrum tailed virus 13	HRTV-13	solar saltern, Samut Sakhon, Thailand	PMID: 25866903	myovirus	Halorubrum sp. SS8-2	Halorubrum sp. SS8-2	PMID: 25866903	76666	4	DTR, 269 bp	MZ334510
					Halorubrum tailed virus 21	HRTV-21	solar saltern, Samut Sakhon, Thailand	PMID: 25866903	myovirus	Halorubrum sp. SS10-9	Halorubrum sp. SS10-9	PMID: 25866903	76556	4	DTR, 303 bp	MZ334511
				species	Halovirus HF1	HF1	solar saltern, Cheetham saltworks, Australia	PMID: 15090523	myovirus	Haloferax sp. Aa2.2	nc		75898	5	DTR, 306 bp	AY190604
					Halorubrum phage HF2	HF2	solar saltern, Cheetham saltworks, Australia	PMID: 11967086	myovirus	Halorubrum coriense Ch2	nc		77670	5	DTR, 306 bp	AF222060
					Halorubrum coriense virus Hardycor2	Hardcor2	Lake Hardy, Australia	PMID: 32276506	myovirus	Halorubrum coriense	nc		77342	5	DTR, 306 bp	MN901520
				species	Halorubrum tailed virus 24	HRTV-24	solar saltern, Samut Sakhon, Thailand	PMID: 25866903	myovirus	Halorubrum sp. SS10-9	Halorubrum sp. SS10-9	PMID: 25866903	77537	3	DTR, 327 bp	MZ334512
					Haloarcula japonica head-tail virus 2	HJTV-2	solar saltern, Samut Sakhon, Thailand	PMID: 22003883	myovirus	Haloarcula japonica	Haloarcula japonica	doi.org/10.1016/S0723-2020(11)80165-7	76821	3	DTR, 319 bp	MZ334513
					Halorubrum sodomense head-tail virus 3	HSTV-3	solar saltern, Eilat, Israel	PMID: 22003883	myovirus	Halorubrum sodomense	Halorubrum sodomense	doi.org/10.1099/00207713-33-2-381	76908	3	DTR, 325 bp	MZ334514
					Haloarcula japonica tailed virus 3	HJTV-3	solar saltern, Samut Sakhon, Thailand	PMID: 25866903	myovirus	Haloarcula japonica	Haloarcula japonica	doi.org/10.1016/S0723-2020(11)80165-7	77353	3	DTR, 309 bp	MZ334515
					Halorubrum tailed virus 15	HRTV-15	solar saltern, Samut Sakhon, Thailand	PMID: 25866903	myovirus	Halorubrum sp. SS6-2	Halorubrum sp. SS6-2	PMID: 25866903	76242	3	DTR, 324 bp	MZ334516
				species	Halorubrum coriense virus Serpecor1	Serpecor1	Serpentine Lake, Australia	PMID: 32276506	myovirus	Halorubrum coriense	nc		74196	4	DTR, 320 bp	MN901521
		Mincapvirus	Referring to the minor capsid protein identified in the lattice of HSTV-2	species	Halorubrum sodomense head-tail virus 2	HSTV-2	solar saltern, Eilat, Israel	PMID: 23283946	myovirus	Halorubrum sodomense	Halorubrum sodomense	doi.org/10.1099/00207713-33-2-381	68527	1	DTR, 340 bp	KC117376
					Halorubrum head-tail virus 7	HRTV-7	solar saltern, Margherita di Savoia, Italy	PMID: 23470522	myovirus	Halorubrum sp. B2-2	Halorubrum sp. B2-2	PMID: 22003883	69048	1	DTR, 340 bp	KC292021
					Halorubrum head-tail virus 2	HRTV-2	solar saltern, Margherita di Savoia, Italy	PMID: 22003883	myovirus	Halorubrum sp. s1-2	Halorubrum sp. s1-2	PMID: 22003883	68923	1	DTR, 340 bp	MZ334517
					Halorubrum head-tail virus 11	HRTV-11	solar saltern, Sečovlje, Slovenia	PMID: 22003883	myovirus	Halorubrum sp. SL-5	Halorubrum sp. SL-5	PMID: 22003883	71449	1	DTR, 340 bp	MZ334518
					Haloarcula californiae tailed virus 6 (13)	HCTV-6 (HCTV-13)	solar saltern, Samut Sakhon, Thailand	PMID: 25866903	myovirus	Haloarcula californiae	Haloarcula californiae	PMID: 25866903	71672	1	DTR, 342 bp	MZ334519
					Haloarcula californiae tailed virus 15	HCTV-15	solar saltern, Samut Sakhon, Thailand	PMID: 25866903	myovirus	Haloarcula californiae	Halorubrum sp. SS6-2	PMID: 25866903	71672	1	DTR, 342 bp	MZ334520
		Laminvirus	Referring to the Laminin G gene, which is one of the distinguishing features of HRTV-25 compared to other members of the family	species	Halorubrum tailed virus 25	HRTV-25	solar saltern, Samut Sakhon, Thailand	PMID: 25866903	myovirus	Halorubrum sp. SS13-12	Halorubrum sp. SS10-9	PMID: 25866903	61934	?	DTR, 242 bp	MZ334521
		Minorvirus	Referring to the smallest genome in the virus family	species	Halorubrum tailed virus 27	HRTV-27	solar saltern, Samut Sakhon, Thailand	PMID: 25866903	myovirus	Halorubrum sp. SS13-13	Halorubrum sp. SS10-9	PMID: 25866903	56593	0	DTR, 679 bp	MZ334522
Druskaviridae(F2)	From Lithuanian druska, for salt	Tredecimvirus	From tredecim means 13 in Latin, referring to the T=13 symmetry of the HVTV-1 capsid	species	Haloarcula vallismortis head-tail virus 1	HVTV-1	solar saltern, Samut Sakhon, Thailand	PMID 23733949	siphovirus	Haloarcula vallismortis	nc		102319	1	DTR, 585 bp	KC117377
					Haloarcula vallismortis head-tail virus 2	HVTV-2	solar saltern, Samut Sakhon, Thailand	PMID: 22003883	siphovirus	Haloarcula vallismortis	Haloarcula vallismortis	PMID: 667737	102319	1	DTR, 585 bp	MZ334523
				species	Haloarcula californiae head-tail virus 5	HCTV-5	solar saltern, Samut Sakhon, Thailand	PMID: 23470522	siphovirus	Haloarcula californiae	nc		102105	1	DTR, 583 bp	KC292027
		Hacavirus	Referring to the host; truncation of Haloarcula and californiae	species	Haloarcula californiae head-tail virus 1	HCTV-1	solar saltern, Margherita di Savoia, Italy	PMID: 23470522	siphovirus	Haloarcula californiae	nc		103257	1	DTR, 739 bp	KC292029
					Haloarcula californiae tailed virus 16	HCTV-16	solar saltern, Samut Sakhon, Thailand	PMID: 25866903	siphovirus	Haloarcula californiae	Haloarcula californiae	PMID: 25866903	104681	1	DTR, 670 bp	MZ334524
Soleiviridae (F3)	Truncation of solar [saltern] and Eilat (referring to the source of isolation)	Eilatmyovirus	Referring to the source of isolation	species	Haloarcula head-tail virus 2	HATV-2	solar saltern, Eilat, Israel	PMID: 22003883	myovirus	Haloarcula sp. E301-5	Haloarcula sp. E301-5	PMID: 22003883	63301	3	DTR, 291 bp	MZ334525
Halomagnusviridae (F4)	Halo for halophilic + magnus, from Latin for large	Hagravirus	Referring to the host; Ha for halo, gra for Halogranum	species	Halogranum head-tail virus 1	HGTV-1	solar saltern, Samut Sakhon, Thailand	PMID: 23470522	myovirus	Halogranum sp. SS5-1	nc		143855	36	Circ perm	KC292026
Haloferuviridae (F5)	Referring to the hosts; Truncation of Haloferax and Halorubrum	Retbasiphovirus	Referring to the source of isolation	species	Haloferax tailed virus 1	HFTV1	saline lake Retba, Cape Verde Peninsula, Senegal	PMID: 30920125	siphovirus	Haloferax sp. LR2-5	nc		38059	0	Circ perm	MG550112
		Dipdavirus	Referring to the dpdA gene encoded by the virus	species	Halorubrum tailed virus 29	HRTV-29	solar saltern, Samut Sakhon, Thailand	PMID: 25866903	siphovirus	Halorubrum sp. SS7-4	Halorubrum sp. 7-4	PMID: 22357279	36603	0	nd	MZ334526
		Saldibavirus	Truncation of Saline di Barletta, referring to the source of isolation (the place now known as Margherita di Savoia)	species	Halorubrum head-tail virus 4	HRTV-4	solar saltern, Margherita di Savoia, Italy	PMID: 23470522	siphovirus	Halorubrum sp. s5a-3	n.c.		35722	0	Circ perm	KC292023
Pyrstoviridae (F6)	From Finnish pyrstö, for fish tail	Hatrivirus	Spelling out of HATV-3 (with some omissions)	species	Haloarcula tailed virus 3	HATV-3	solar saltern, Samut Sakhon, Thailand	PMID: 25866903	siphovirus	Haloarcula sp. SS8-5	Haloarcula sp. SS8-5	PMID: 25866903	42293	0	Circ perm	MZ334527
Shortaselviridae (F7)	Referring to short tail, sel from French for salt	Lonfivirus	Referring to the long fibers of HSTV-1	species	Haloarcula sinaiiensis head-tail virus 1	HSTV-1	solar saltern, Margherita di Savoia, Italy	PMID: 23733949	podovirus	Haloarcula sinaiiensis	nc		32189	0	Circ perm	KC117378
Graaviviridae (F8)	From Finnish graavi, meaning raw cooking of fish with salt	Beejeyvirus	Spelling of "BJ"	species	Archaeal BJ1 virus	BJ1	hypersaline Lake Bagaejinnor, China	PMID: 17996081	siphovirus	Halorubrum saccharovorum BJB11	nc		42271	1	nd	AM419438
		Seejivirus	Spelling of "CG"	species	Halorubrum phage CGphi46	CGphi46	hypersaline pond (saltern), Newark, CA, USA		nd	Halorubrum sp. M4 25-10-8A	nc		39784	0	nd	HQ332141
Vertoviridae (F9)	From Latin verto, meaning invert (referring to the invertible tail fiber locus)	Myohalovirus	Truncation of myovirus and halophilic	species	Natrialba phage PhiCh1	phiCh1	Natrialba magadii provirus	PMID: 12139629	myovirus	Natrialba magadii strain L11	nc		58487	0	Circ perm	MK450543
				species	Halobacterium phage phiH variant phiH1	phiH1	Halobacterium salinarum provirus	PMID: 30322017	myovirus	Halobacterium salinarum R1	nc		58072	0	Circ perm	MK002701
		Chaovirus	Referring to the name of the virus	species	Halobacterium virus ChaoS9	ChaoS9	Halobacterium salinarum cell lysis in bioreactor	PMID: 30832293	myovirus	Halobacterium salinarum strain S9	nc		55145	1	Circ perm	MK310226
Suolaviridae (F10)	From Finnish suola, for salt	Pormufvirus	For fusion of the portal and mu gpF proteins	species	Halorubrum tailed virus 28	HRTV-28	solar saltern, Samut Sakhon, Thailand	PMID: 25866903	siphovirus	Halorubrum sp. SS8-7	Halorubrum sp. SS8-7	PMID: 25866903	35270	0	nd	MZ334528
Saparoviridae (F11)	From Finnish saparo, for pig tail	Samsavirus	Truncation of Samut Sakhon, referring to the source of isolation	species	Haloarcula californiae head-tail virus 2	HCTV-2	solar saltern, Samut Sakhon, Thailand	PMID: 23470522	siphovirus	Haloarcula californiae	nc		54291	0	Circ perm	KC292028
		Halohivirus	Referring to the host; truncation of Haloarcula and hispanica	species	Haloarcula hispanica head-tail virus 2	HHTV-2	solar saltern, Samut Sakhon, Thailand	PMID: 23470522	siphovirus	Haloarcula hispanica	nc		52643	0	Circ perm	KC292024
Madisaviridae (F12)	Truncation of Margherita di Savoia (place of isolation)	Clampvirus	Referring to the DNA polymerase sliding clamp encoded by the virus	species	Haloarcula hispanica head-tail virus 1	HHTV-1	solar saltern, Margherita di Savoia, Italy	PMID: 23470522	siphovirus	Haloarcula hispanica	nc		49107	0	Circ perm	KC292025
Leisingerviridae (F13)	After the name of Thomas Leisinger, who isolated the virus psiM2	Psimunavirus	Ratified ICTV name	species	Methanobacterium phage psiM2	PsiM2	deletion mutant of PsiM1 that was isolated from a sludge digester	PMID: 9791169	siphovirus	Methanothermobacter marburgensis DSM 2133 (formerly Methanobacterium thermoautotrophicum Marburg)	nc		26111	0	Circ perm	AF065411
				species	Methanothermobacter phage psiM100	PsiM100	Methanothermobacter wolfeii provirus	PMID: 11544247	siphovirus	Methanothermobacter wolfeii	nc		28781	0	nd	AF301375
Anaerodiviridae (F14)	Truncation of anaerobic digester (referring to source of isolation)	Metforvirus	Referring to the host; truncation of Methanobacterium formicicum	species	Methanobacterium virus Drs3	Drs3	anaerobic digester	PMID: 30523430	siphovirus	Methanobacterium formicicum Khl10	nc		37129	0	nd	MH674343
*Host strain used for virus production in this study; nc, virus not cultivated in this study; nd, not determined
Text in red indicates the new viruses sequenced in this study
Coloured fields indicate viruses with nearly identical genomes (sequence variation from 1 to 17 nts). Note that the genomes of HCTV-7 and HCTV-12 are identical, HCTV-6 and HCTV-13 are identical.
