# Supplementary material for: Diversity, taxonomy, and evolution of archaeal viruses of the class Caudoviricetes
Source: PLoS Biol. 2021 Nov 9;19(11):e3001442. doi: 10.1371/journal.pbio.3001442 (PMC8651126; doi:10.1371/journal.pbio.3001442)
Supplement: S2 Table — arTV, archaeal tailed virus; PC, protein cluster. (XLSX) [file pbio.3001442.s005.xlsx]

## Sheet: S2_Table
Note that only virus families are listed (see families in Table S1). For more information on specific viruses, see details in S2 Data (Figure 2 PCs)
S2 Table Protein clusters (PCs) generated for arTVs by vConTACT 2.0
protein cluster	annotation	virus families from GRAViTy
PC_00258	staphylococcal nuclease	F1	F9	F11
PC_00350	HNH	F5	F2
PC_00476	baseplate wedge protein T4 gp6-like, J-like protein	F1	F9	F3	F4
PC_00520	PolB	F1	F3	F2	F4
PC_00521	tail TMP	F14
PC_00552		F1
PC_00553	Zn ribbon	F1
PC_00587	thymidylate synthase thyX	F1	F2	F4
PC_00612	Mre11 nuclease, N terminal HTH, C terminal metallophosphatase domain	F1	F8	F5
PC_00627	tRNA adenylyltransferase	F4
PC_00647	MCP	F4
PC_00672	tail sheath	F1	F3	F4
PC_00706	polysaccharide lyase	F1	F3
PC_00707	Mu gpF-like	F12
PC_00708	portal	F1
PC_00709	MCP	F1
PC_00748	phage tail protein P2 gpI-like	F1
PC_00749		F1	F3	F4
PC_00751	terminase small subunit	F1
PC_00752	terminase large unit	F1
PC_00753	prohead protease	F1
PC_00754		F1
PC_00755	tail tube	F1
PC_00756	phage P2 GpU-like tail protein	F1
PC_00757	baseplate hub (central) protein Mu gp44-like	F1
PC_00758	PAAR repeat protein	F1	F9
PC_00759	baseplate wedge protein T4 gp25-like	F1
PC_00760	Cas4 nuclease	F1
PC_00761	AE primase small and large subunit	F1
PC_00762	transcription initiation factor TFIIB, cyclin-like domain (interact with TBP)	F1
PC_00763	nuclease, ERCC4 domain	F1
PC_00798	helicase, MCM	F1
PC_00799		F1
PC_00800	ribonucleotide diphosphate reductase (RnR)	F1	F2	F4
PC_00857	head completion protein SPP1 gp16-like	F1
PC_00858	BcepMu Gp37, homologous to SPP1 tail completion protein GP17	F1
PC_00859	dUTPase domain containing protein	F1
PC_00860		F1
PC_00861	integrase, tyrosine recombinase	F1
PC_00862	transcriptional regulator, cro/C1 type HTH domain	F1
PC_00863	Zn ribbon	F1
PC_00864		F1
PC_00865	dCTP deaminase-dUTPase	F1	F2	F4
PC_00866		F2	F5
PC_00921		F1
PC_00922	HNH	F9
PC_00982		F1
PC_00983	tRNA splicing ligase RtcB	F1	F2	F4
PC_00985	DUF4326	F12
PC_01010	DNA processing protein, recombination-mediator protein A	F4
PC_01048		F1
PC_01049	DNA N-4/N-6 methyltransferase	F5	F9	F14
PC_01106	head decoration protein lambda gpD	F1
PC_01107	tail TMP	F1
PC_01108		F1
PC_01109	SPFH(stomatin,prohibitin,flotillin,and HflK/C)superfamily	F1	F4	F11
PC_01110		F1	F2	F4
PC_01111	HNH	F2	F4
PC_01114	DNA single-strand annealing protein (SSAPs), ERF superfamily	F14
PC_01169	baseplate assembly protein V	F1	F3
PC_01170		F1	F1
PC_01171		F1
PC_01172		F1
PC_01173	helicase,SF2,repair	F1
PC_01174		F1
PC_01175	DUF4258	F1
PC_01228		F1
PC_01229		F1
PC_01230		F1
PC_01231	homing endonuclease,LAGLIDADG	F1
PC_01232		F1
PC_01233		F1
PC_01234		F1
PC_01235		F1
PC_01236		F1
PC_01237		F1
PC_01238		F1
PC_01239	HTH-transcriptional regulator, C terminal	F1
PC_01240		F1
PC_01241		F1
PC_01242		F1
PC_01243		F1
PC_01244	Zinc finger	F1
PC_01245		F1
PC_01246		F1
PC_01247	Zn ribbon domain	F1
PC_01248	Zn ribbon domain	F1
PC_01249		F1
PC_01250		F1
PC_01251		F1
PC_01252		F1
PC_01253		F1
PC_01254		F1
PC_01255		F1
PC_01256		F1
PC_01257		F1
PC_01258		F1
PC_01259	Zn-ribbon	F1
PC_01260		F1
PC_01261		F1
PC_01262		F1
PC_01263		F1
PC_01264		F1
PC_01265		F1
PC_01266		F1
PC_01329		F1
PC_01330		F1
PC_01331		F1
PC_01332		F1
PC_01333		F1
PC_01334	GTP cyclohydrolase	F2
PC_01335	N6-adenosine-methyltransferase	F10
PC_01406		F1
PC_01407		F1
PC_01408		F1
PC_01409	Zn finger	F1
PC_01410		F1
PC_01411		F1
PC_01412	SAM-dependent methyltransferase	F14
PC_01505	HNH and Zn finger	F5	F2	F9	F6	F10	F4	F1
PC_01506	Zn ribbon	F1
PC_01507		F1
PC_01509	N6 adenine-specific DNA methyltransferase	F2	F11
PC_01541	DUF5131	F9
PC_01591	HNH	F1	F2	F6	F4	F7	F11
PC_01757	AE primase small subunit catalytic domain, N terminal; replicative helicase, C terminal	F8
PC_01801	integrase, tyrosine recombinase, XerC	F1
PC_01802	SAM-dependent methyltransferase, putative RNA methylase domain, but the protein do not contain the THUMP domain which bind to RNA	F10	F7
PC_01811	terminase large subunit	F13
PC_02053	adhesin	F1
PC_02289		F3	F4
PC_02290		F1
PC_02706	thymidylate kinase	F2	F3	F4
PC_02707	portal	F6
PC_02718	DNA ligase	F4
PC_02728	chromosome partitioning protein ParB domain, N terminal; SAM-dependent DNA methyltransferase, C terminal	F11
PC_02904		F1
PC_02905	cytosine-5 methyltransferase	F9
PC_02906	transposase	F9
PC_02932	N-acetyltransferase (NAT), GNAT domain	F4
PC_03049	RNA ligase 2	F4
PC_03124	HNH	F9
PC_03125	restriction modification type IIG, N terminal endonuclease domain, N6_Methylase domain,C terminal TRD domain	F1
PC_03126		F1
PC_03127	Zn finger	F1
PC_03128		F1
PC_03129		F1
PC_03132		F1
PC_03136	terminase large subunit	F14
PC_03426	peroxide stress protein YaaA C terminal	F9	F5
PC_03563	Zn dependent metalloprotease, SprT-like	F4
PC_03724		F1
PC_03725	Zn binding protein	F1
PC_03955	5-cytosine DNA methytransferase	F2	F4
PC_03957		F1
PC_03958		F1
PC_03959		F1
PC_04193		F4
PC_04281	N-acetyltransferase, GNAT domain	F3
PC_04282	HNH	F2	F4
PC_04284	laminin G domain,carbohydrate-binding module CBM4/9	F1
PC_04641		F1
PC_04642		F1
PC_04643		F1	F4
PC_04644		F1
PC_04645	N-4/N-6 DNA methyltransferase	F1	F10	F9	F7
PC_04806		F11
PC_05082	endonuclease, PD-(D/E)XK motif	F1	F3
PC_05084	adhesin	F1
PC_05085		F1
PC_05086		F1
PC_05087		F1
PC_05089	adenine-specific DNA methyltransferase, restriction modification system	F1
PC_05175	chromosome partitioning protein ParB domain, N terminal; SAM-dependent DNA methyltransferase, C terminal	F11
PC_05412		F4
PC_05664	Zeta toxin domain (P-loop containing nucleoside triphosphate hydrolases superfamily), ADP ribosyltransferase domain	F2
PC_05665		F1
PC_05898	thioredoxin	F4
PC_05901	terminase large subunit	F12
PC_06175	portal, N terminal ; phage Mu gpF-like protein, C terminal	F5	F3	F10	F4	F7
PC_06176	tail spike, pectin lyase fold	F6
PC_06177		F1
PC_06178	Zn ribbon domain	F1
PC_06179	homing endonuclease,LAGLIDADG	F1
PC_06180	DUF932	F1	F11
PC_06181		F1	F4
PC_06182	ATPase domain, GHKL superfamily	F1	F4
PC_06184	Zn ribbon	F1
PC_06185		F1
PC_06189	NTP (nucleoside triphosphae) pyrophosphohydrolase MazG domain	F9
PC_06660	HD domain containing protein	F4	F8
PC_06994	phage Mu gpF-like protein	F2	F12
PC_06995	PCNA	F5	F9	F6	F12	F7	F8
PC_06996	MCM	F5	F6	F7	F8
PC_06997	dual specificity protein phosphtase (DUSP), tyrosine phosphatase family	F1	F4
PC_06998		F1
PC_06999	DUF1599	F1
PC_07000		F1
PC_07001	restriction modification, N terminal endonuclease domain, N6_Methylase domain,C terminal TRD domain	F1
PC_07002	Zn finger domain containing protein	F1	F4
PC_07003		F1
PC_07004	ERCC4 nuclease	F14	F2
PC_07005	radical SAM (S-Adenosyl-l-methionine) enzyme	F2
PC_07006	QueC, queuosine biosynthesis protein	F2
PC_07007	QueF, NADPH-dependent 7-cyano-7deazaguanine reductase	F2
PC_07008	terminase large subunit	F2	F11
PC_07009	head completion protein, HK97 gp6-like/SPP1 gp15-like	F2	F11
PC_07010	Zn finger	F2	F11
PC_07011		F1
PC_07012	DUF1425	F1
PC_07013		F1
PC_07014	DNA gyrase inhibitor Yac	F1
PC_07015	terminase small subunit	F5	F10	F8	F12
PC_07016	tail TMP	F2	F10	F11	F12
PC_07019	homing endonuclease,LAGLIDADG motif	F2	F1	F4
PC_07022	DNA (C5)-methyltransferase	F5
PC_07347	glycosyltransferase 2-like, GT-A?	F11
PC_08009	phage receptor binding protein, lactophage P2 N terminal	F2	F6	F11
PC_08010		F1
PC_08011		F1
PC_08012		F1
PC_08013		F1
PC_08014		F1
PC_08015		F1
PC_08016	head decoration protein lambda gpD	F1
PC_08017	phosphatidylinositol 4-kinase, N terminal HK97 gp10 like	F1
PC_08018		F1
PC_08019		F1
PC_08020	tail TMP	F1
PC_08021	baseplate assembly protein V	F1
PC_08022		F1
PC_08023		F1
PC_08024		F1
PC_08025		F1
PC_08026		F1
PC_08027	nucleotide kinase, NK superfamily	F1
PC_08028	LEM domain	F1
PC_08029		F1
PC_08030		F1
PC_08031		F1
PC_08032		F1
PC_08033		F1
PC_08034		F1
PC_08035		F1
PC_08036		F1
PC_08037	rubredoxin, electron transport	F1
PC_08038		F1
PC_08039	HTH	F1
PC_08040		F1
PC_08041	DUF4258	F1
PC_08042		F1
PC_08043		F1
PC_08044		F1
PC_08045		F1
PC_08046	tudor domain, chromatin and lamin binding protein, recognize methylated histones	F1
PC_08047		F1
PC_08048		F1
PC_08049		F1
PC_08050		F1
PC_08051		F1
PC_08052	Zn dependent metalloprotease, SprT-like	F1	F2
PC_08054		F2
PC_08055	replication factor C (RFC), clamp loader, AAA+ domain, RFC domain	F2
PC_08056	replication factor C (RFC), clamp loader, AAA+ domain, RFC domain	F2
PC_08058	RadA N-terminal domain	F2	F4
PC_08059		F2	F9
PC_08060		F1
PC_08061		F1
PC_08062	Zn ribbon	F1
PC_08063	GIY-YIG nuclease catalytic domain	F5	F10	F7	F11
PC_08064	Mu-like gpG protein	F2	F11	F12
PC_08065	tail assembly chaperone	F2
PC_08066	cancanavalin A-like lectin/glucanase domain superfamily, Laminin G-like jellyroll fold	F2	F11	F12
PC_08070	MCP	F14	F13
PC_08072	Mu gpG-like/HK97 gp10-like	F14
PC_09325		F1	F2	F3	F5
PC_09326	endonuclease, GIY-YIG domain	F3
PC_09328	N terminal HTH DNA binding domain, C terminal HNH endonuclease	F3
PC_09329		F5	F6	F8
PC_09330	Rad52 homolog, DNA single-strand annealing protein	F5	F6	F7
PC_09331		F5	F6	F10
PC_09332	complement c1q-like protein domain, C terminal	F1
PC_09333		F1
PC_09334		F1
PC_09335		F1
PC_09336		F1
PC_09337	Zn ribbon	F2
PC_09338	Zn finger, C2H2	F2
PC_09339		F2
PC_09340		F2
PC_09341		F2
PC_09342		F2
PC_09343	Zn ribbon	F2
PC_09344	Zn ribbon, C4 type	F2
PC_09345		F2
PC_09346		F2
PC_09347	PAX (paired box) DNA-binding domain	F2
PC_09348	YodL-like protein	F2
PC_09349		F2
PC_09350		F2
PC_09351	Mre11 nuclease, N terminal HTH, C terminal metallophosphatase domain	F2
PC_09352	5'(3')-deoxyribonucleotidase, HAD_like superfamily	F2
PC_09353	transcriptional regulator, HTH	F2
PC_09354	Holliday juction resolvase	F2
PC_09355	nucleoside triphosphate pyrophosphohydrolase, MazG domain	F2
PC_09356	Zn ribbon	F2
PC_09357		F2
PC_09358		F2
PC_09359		F2
PC_09360		F2
PC_09361		F2
PC_09362	CobT, cobalamin biosynthesis protein, C terminal vWA domain	F2
PC_09363	ATPase, AAA+ domain	F2
PC_09364		F2
PC_09365		F2
PC_09366		F2
PC_09367		F2
PC_09368		F2
PC_09369		F2
PC_09370	QueD, 6-pyruvoyl tetrahydropterin synthase (PTPS)	F2
PC_09371		F2
PC_09372	acetyltransferase, GNAT family	F2
PC_09373	Cas4 nuclease	F2
PC_09374	Zn ribbon domain	F2
PC_09375		F2
PC_09376	transcriptional regulator, winged HTH	F2
PC_09377	AE primase small and large subunit	F2
PC_09378	DNA polymerase sliding clamp,PCNA	F2
PC_09379	RadB DNA repair and recombinase	F2
PC_09380		F2
PC_09381	RecA-like, DNA repair and recombinase	F2
PC_09382	transcriptional regulator, HTH	F2
PC_09383	portal	F2
PC_09384	Zn finger	F2
PC_09385	prohead protease	F2
PC_09386	MCP	F2
PC_09387		F2
PC_09388		F2
PC_09389		F2
PC_09390		F2
PC_09391		F2
PC_09392	ribonuclease H1,hydrolysis of RNA x DNA hybrid (RNA virus)	F2
PC_09393		F2
PC_09394		F2
PC_09395		F2
PC_09396		F2
PC_09397		F2
PC_09398		F2
PC_09399		F1
PC_09400		F1
PC_09401		F1
PC_09402		F1
PC_09403		F1
PC_09404		F1
PC_09405		F1
PC_09406		F1
PC_09407		F1
PC_09408		F1
PC_09409	phage tail-collar fibre protein	F2	F11
PC_09410	phage minor protein U	F2	F11
PC_09411	tail tube	F2	F11
PC_09412	phage P2 GpU-like tail protein	F2	F11
PC_09413	baseplate hub (central) protein Mu gp44-like	F2	F11
PC_09414	fibronectin type III-like domain	F2	F11
PC_09415	PQQ (pyrrolo-quinoline quinone)	F2	F11
PC_09416	Zn ribbon	F2	F11
PC_09418	portal	F9	F8
PC_09421	prohead protease	F9	F8
PC_09422	integrase	F9	F8	F2
PC_09423	HNH	F9
PC_09424	transposase	F9
PC_09425	transcriptional regulator	F9	F11	F7
PC_09426	lactophage p2 receptor binding protein N terminal	F9	F4	F12
PC_09467	ASCH domain	F13
PC_11450	tail P2 gpI-like protein	F9	F3
PC_11452	Mu gpG-like/HK97 gp10-like	F6
PC_11453	immunoglobulin-like fold; baseplate hub, Mu gp44-like; tail-collar fibre; CBM6-CBM35-CBM36 like carbohydrate binding domain	F5	F6
PC_11455		F1
PC_11456		F1
PC_11457		F1
PC_11458		F1
PC_11459		F1
PC_11460	winged HTH, N terminal	F1
PC_11461		F1
PC_11462		F2
PC_11463	Zn finger, C4	F2
PC_11464		F2
PC_11465		F2
PC_11468		F2
PC_11469		F2
PC_11470	endopeptidase domain containing protein	F2
PC_11471	tail assembly chaperone	F2
PC_11472		F2
PC_11473		F2
PC_11474		F1
PC_11475		F1
PC_11476		F1
PC_11477		F1
PC_11478	ribosomal protein L21e	F1
PC_11479	transcription factor S-II(TFIIS) domain, Zn finger	F1
PC_11480	baseplate upper protein, BppU N terminal domain	F1
PC_11481	endonuclease, LAGLIDADG motif	F2
PC_11482	terminase large subunit	F10	F7	F8
PC_11483	capsid scaffolding protein/prohead peptidase, P2 gpO-like	F5
PC_11484	prohead protease	F14	F7	F11
PC_11485	phosphoadenosine phosphosulphate reductase (PAPS)	F5
PC_11487	endonuclease, GIY-YIG motif	F2
PC_11489	Zn finger	F2
PC_11492	terminase large subunit	F4
PC_11494	Mu gpF-like	F14	F9
PC_11495	MCP	F9	F8
PC_11496		F9	F8
PC_11497	baseplate hub	F9
PC_11498		F9
PC_11500	Partition protein Soj	F9
PC_11502		F9
PC_11503	winged HTH	F9	F8	F11
PC_11504		F9	F12	F1
PC_11506	NTP (nucleoside triphosphae) pyrophosphohydrolase MazG domain	F9
PC_11815	nucleotidyltransferase	F4
PC_12455	baseplate wedge protein T4 gp6-like	F4
PC_13203		F7
PC_13781	tail assembly charperone	F11
PC_13880		F11
PC_14484	portal	F3
PC_14486	MCM helicase	F3	F4
PC_14487	terminase large subunit	F6	F9	F8
PC_14488		F6	F9
PC_14489		F2
PC_14490	adhesin	F2	F1
PC_14491		F1
PC_14492		F1
PC_14493	restriction modification, N terminal endonuclease domain, N6_Methylase domain,C terminal TRD domain	F1
PC_14494		F1
PC_14495	DUF5049	F2
PC_14496		F2
PC_14497		F2
PC_14498	Zn ribbon	F2
PC_14499		F2	F5
PC_14501		F2
PC_14503		F2	F3
PC_14505		F8
PC_14506	HK97 gp10-like	F8
PC_14507	DNA methyltransferase, N6 adenine-specific	F1
PC_14508	NucT-like nuclease, PLD domain	F1
PC_14509		F1
PC_14510		F1
PC_14511		F1
PC_14512		F1
PC_14513		F1
PC_14514		F1
PC_14515		F1
PC_14516	HK97 gp10-like, N terminal	F1
PC_14517	Zn finger	F1	F4
PC_14518	baseplate protein T4 gp9-like,C terminal	F1	F5
PC_14519		F10	F8	F11
PC_14520		F5	F10
PC_14521	terminase large subunit	F5
PC_14522	Zn finger, C2H2	F5
PC_14523	HhH	F5
PC_14524	head decoration protein	F5
PC_14525	MCP	F5
PC_14526		F5
PC_14527		F5
PC_14528		F5
PC_14529	head completion protein, SPP1 gp15-like/HK97 gp6-like	F5
PC_14530	Mu gpG-like/ HK97 gp10-like	F5
PC_14531	tail completion protein, SPP1 gp17-like	F5
PC_14532	tail tube	F5
PC_14533		F5
PC_14534		F5
PC_14535	tail TMP	F5
PC_14536	P2 gpU-like??	F5
PC_14537	RelE mRNA-degrading endoribonuclease, RelE/ParE toxin domain superfamily	F5
PC_14538		F2
PC_14539		F2
PC_14540		F2
PC_14541		F2
PC_14542		F2
PC_14543		F2
PC_14544	endonuclease, Zn finger domain, NUMOD3 motif, GIY-YIG motif, DNA mismatch endonuclease Vsr domain	F2
PC_14545		F2
PC_14546		F2
PC_14547		F2
PC_14548		F2
PC_14549		F2
PC_14550	homing endonuclease,LAGLIDADG motif	F2
PC_14551	homing endonuclease,LAGLIDADG motif	F2
PC_14552		F2
PC_14553		F2
PC_14554		F2
PC_14555		F2
PC_14556	DUF3307	F2
PC_14557		F2
PC_14558		F2
PC_14559		F2
PC_14562	HNH	F9
PC_14563	HTH	F9
PC_14564	portal	F14	F13
PC_14565		F9	F8	F5
PC_14566	prohead protease	F13
PC_14567		F9
PC_14568	Mu gpG-like/HK97 gp10-like	F9
PC_14569		F9
PC_14570		F9
PC_14571		F9
PC_14572		F9
PC_14573		F9
PC_14574		F9
PC_14575		F9
PC_14576		F9
PC_14577		F9
PC_14579		F9
PC_14580		F9
PC_14583	adenine specific methyltransferase	F9	F4
PC_14584		F9
PC_14585		F9
PC_14586		F9
PC_14587	tail-collar fibre protein, DUF3751	F9	F4
PC_14588		F9
PC_14589	glutamine amidotransferase (GATase) type 2	F9
PC_14590		F9
PC_14592	ATPase, AAA+ domain	F14
PC_16911	Ro ribonucleoprotein-like, TROVE domain, von Willebrand factor type A domain	F4
PC_17529	MCP	F7	F11
PC_17530	von Willebrand factor, type A,CobT	F11
PC_18656	transcription initiation factor TFIIB cyclin-like domain	F3	F4
PC_18657	nuclease, PD-(D/E)XK endonuclease-like domain, AddAB-type	F3	F4
PC_18658	Holliday junction resolvase	F3	F4
PC_18660		F3	F4
PC_18661	Zn dependent metalloprotease, SprT-like	F3
PC_18662	protein kinase domain	F3
PC_18663	DNA glycosylase, HhH-GPD domain	F3
PC_18664	terminase small subunit	F6	F4
PC_18665	phage Mu gpF-like	F6	F9
PC_18666		F6	F5
PC_18667	restriction endonuclease type II-like or HJR	F6	F11
PC_18668	Zn finger	F6	F8
PC_18669		F6	F5
PC_18670		F6	F7
PC_18671		F5	F6
PC_18672		F1
PC_18673		F1
PC_18674	Zn finger, C2H2 N terminal ; HNH endonuclease, C terminal	F1
PC_18675		F1
PC_18676		F9
PC_18677		F2
PC_18678		F2
PC_18679		F2
PC_18680		F2
PC_18681		F2
PC_18682	Zn finger	F2
PC_18683	Zn ribbon	F2
PC_18684		F2
PC_18685		F2
PC_18686	DUF1660	F2
PC_18687		F2
PC_18688	BppU N terminal domain (baseplate upper protein N t)	F2
PC_18689		F2
PC_18690		F2
PC_18691	uncharacterized PurR-regulated membrane protein YhhQ	F2
PC_18692		F2
PC_18693		F2
PC_18695		F2
PC_18696		F2
PC_18697		F2
PC_18698	portal, N terminal; Mu gpF-like	F11
PC_18699	Mu-like gpG protein	F2
PC_18700		F2
PC_18701		F2
PC_18702	tail tube protein	F2
PC_18703		F2
PC_18704	phage P2 GpU-like tail protein	F2
PC_18705	tail TMP	F2
PC_18706	baseplate hub (central) protein Mu gp44-like/endopeptidase tail??	F2
PC_18707	poly-gamma-glutamate hydrolase domain containing protein (C terminal)	F2
PC_18708		F2
PC_18709		F2
PC_18710		F2
PC_18711		F2
PC_18712		F2
PC_18713		F2
PC_18714		F2
PC_18715		F2
PC_18716		F2
PC_18717		F2
PC_18718		F2
PC_18719		F2
PC_18720		F2
PC_18721		F2
PC_18722		F2
PC_18723		F2
PC_18724		F2
PC_18725		F1
PC_18726	TBP (TATA-box binding protein)	F1
PC_18727		F1
PC_18728		F1
PC_18729		F1
PC_18730		F1
PC_18731		F1
PC_18732	restriction modification, N terminal endonuclease domain, N6_Methylase domain,C terminal TRD domain	F1
PC_18733		F1
PC_18734		F1
PC_18735		F1
PC_18736	haloacid dehalogenase-like hydrolase domain	F1
PC_18737		F1
PC_18738		F1	F12
PC_18739		F1	F4
PC_18740		F1
PC_18742		F1
PC_18744		F10
PC_18745		F10	F5
PC_18746	transcriptional regulator MarR family, winged HTH	F10	F5
PC_18747		F10	F5
PC_18748	HTH	F10	F5
PC_18749	winged HTH	F10	F8
PC_18750		F10	F5
PC_18751		F5
PC_18752	RHH	F5	F9
PC_18753	HTH	F5
PC_18754	Ada-like Zn-binding domain	F5
PC_18755		F5
PC_18756		F5
PC_18757	Zn finger	F5
PC_18758		F5
PC_18759	nucleoside 2-deoxyribosyltransferase	F5	F9
PC_18760		F5
PC_18761	Zn finger, C2H2	F5
PC_18762	Zn ribbon	F2
PC_18763		F2
PC_18764		F2
PC_18765		F2
PC_18766		F2
PC_18767		F2
PC_18768		F2
PC_18769		F2
PC_18770		F2
PC_18771		F2
PC_18772		F2
PC_18773		F2
PC_18774		F2
PC_18775		F2
PC_18776		F2
PC_18777		F2
PC_18778		F2
PC_18779		F2
PC_18780		F2
PC_18781		F11
PC_18782		F2
PC_18783		F2
PC_18784		F2
PC_18785		F2
PC_18786		F2
PC_18787		F2
PC_18788		F2
PC_18789		F2
PC_18790	DUF1108	F2
PC_18792		F5	F12
PC_18793		F8
PC_18794	terminase large subunit	F9
PC_18795		F9
PC_18796	head completion protein SPP1 gp15-like/HK97 gp6-like	F9
PC_18797	head completion protein SPP1 gp16-like	F9
PC_18798		F9
PC_18799		F9
PC_18800		F9
PC_18801		F9
PC_18802		F9
PC_18803		F9
PC_18804		F9
PC_18805		F9
PC_18806		F9
PC_18807		F7	F8
PC_18808		F9
PC_18811		F9
PC_18812		F9
PC_18813		F9
PC_18815		F9
PC_18816		F9
PC_18817		F9
PC_18819		F9
PC_18820		F9
PC_18821		F9
PC_18822		F9
PC_18823		F9	F4
PC_18824	MCP	F9	F12
PC_18825		F9
PC_18826		F8
PC_18827		F9
PC_18829		F9	F8
PC_18830		F9
PC_18919		F13
PC_18920		F13
PC_18921		F13
PC_18922	HTH	F13
PC_18923	TBP	F13
PC_18924		F13
PC_18925	terminase small subunit	F13
PC_18926	Mu gpF-like	F13
PC_18927	head completion protein SPP1 gp15-like/HK97 gp6-like	F13
PC_18928	head completion protein SPP1 gp16-like	F13
PC_18929	Mu gpG-like/HK97 gp10-like	F13
PC_18930		F13
PC_18931	tail tube	F13
PC_18932		F13
PC_18933	tail TMP	F13
PC_18934	P2 GpU-like	F13
PC_18935		F13
PC_18936	baseplate hub-like	F13
PC_18937	baseplate hub-like	F13
PC_18938		F13
PC_18939		F13
PC_18940	pseudomurein endoisopeptidase PeiP, transglutaminase-like domain	F13
PC_18941	integrase, XerD	F13
PC_18942		F13
PC_18943		F13
PC_19039	Zn finger	F13
PC_19237	ASCH domain	F8	F12
PC_19238		F8
PC_20178	ATPase, AAA+ domain	F11
PC_22115		F11
PC_22334	SAM-dependent methyltransferae	F12
PC_23583	SpoVT-AbrB domain	F11
PC_23584	DnaJ J-domain, C terminal	F8
PC_23585		F11
PC_23586	HTH	F11
PC_23587		F10
PC_23588	Zn ribbon	F11
PC_23589	HJR	F11
PC_23590		F11
PC_23591		F11
PC_23592		F11
PC_23593		F11	F12
PC_23601		F2	F4
PC_23602		F4
PC_23603		F5	F8
PC_23604		F2
PC_23619		F7
PC_23646		F8
PC_23647	HhH	F8
PC_23648		F8
PC_23649	P2 gpU-like	F8
PC_23650	P2 gpU-like	F8
PC_23651		F8
PC_23652		F8
PC_23653	tail tube	F8
PC_23654		F8
PC_24720	Zn finger	F8
singleton		Halovirus HRTV-5	YP_008058517.1
singleton		Halovirus HRTV-5	YP_008058566.1
singleton		Halovirus HRTV-8	YP_008058650.1
singleton		Halovirus HF1	NP_861687.1
singleton		Halorubrum phage HF2	NP_542518.1
singleton		Halorubrum phage HF2	NP_542574.1
singleton		Halorubrum phage HF2	NP_542581.1
singleton		Halovirus HSTV-2	YP_007379158.1
singleton		Halovirus HRTV-7	YP_008060063.1
singleton		Halovirus HRTV-7	YP_008060064.1
singleton		Halovirus HCTV-5	YP_008059043.1
singleton		Halovirus HCTV-5	YP_008059049.1
singleton		Halovirus HCTV-5	YP_008059050.1
singleton		Halovirus HCTV-5	YP_008059060.1
singleton		Halovirus HCTV-5	YP_008059061.1
singleton		Halovirus HCTV-5	YP_008059086.1
singleton		Halovirus HCTV-5	YP_008059100.1
singleton		Halovirus HCTV-5	YP_008059124.1
singleton		Halovirus HCTV-5	YP_008059127.1
singleton		Halovirus HCTV-5	YP_008059143.1
singleton		Halovirus HCTV-5	YP_008059157.1
singleton		Halovirus HCTV-5	YP_008059179.1
singleton		Halovirus HCTV-5	YP_008059192.1
singleton		Halovirus HCTV-5	YP_008059203.1
singleton		Halovirus HCTV-5	YP_008059204.1
singleton		Halovirus HCTV-5	YP_008059206.1
singleton		Halovirus HCTV-5	YP_008059207.1
singleton		Halovirus HCTV-5	YP_008059208.1
singleton		Halovirus HCTV-1	YP_008059566.1
singleton		Halovirus HCTV-1	YP_008059569.1
singleton		Halovirus HCTV-1	YP_008059570.1
singleton		Halovirus HCTV-1	YP_008059581.1
singleton		Halovirus HCTV-1	YP_008059663.1
singleton		Halovirus HCTV-1	YP_008059717.1
singleton		Halovirus HCTV-1	YP_008059719.1
singleton		Halovirus HGTV-1	YP_008059209.1
singleton		Halovirus HGTV-1	YP_008059212.1
singleton		Halovirus HGTV-1	YP_008059214.1
singleton		Halovirus HGTV-1	YP_008059216.1
singleton		Halovirus HGTV-1	YP_008059217.1
singleton		Halovirus HGTV-1	YP_008059220.1
singleton		Halovirus HGTV-1	YP_008059222.1
singleton		Halovirus HGTV-1	YP_008059223.1
singleton		Halovirus HGTV-1	YP_008059224.1
singleton		Halovirus HGTV-1	YP_008059226.1
singleton		Halovirus HGTV-1	YP_008059227.1
singleton		Halovirus HGTV-1	YP_008059228.1
singleton		Halovirus HGTV-1	YP_008059229.1
singleton		Halovirus HGTV-1	YP_008059230.1
singleton		Halovirus HGTV-1	YP_008059231.1
singleton		Halovirus HGTV-1	YP_008059232.1
singleton		Halovirus HGTV-1	YP_008059233.1
singleton		Halovirus HGTV-1	YP_008059238.1
singleton		Halovirus HGTV-1	YP_008059240.1
singleton		Halovirus HGTV-1	YP_008059241.1
singleton		Halovirus HGTV-1	YP_008059243.1
singleton		Halovirus HGTV-1	YP_008059244.1
singleton		Halovirus HGTV-1	YP_008059245.1
singleton		Halovirus HGTV-1	YP_008059248.1
singleton		Halovirus HGTV-1	YP_008059249.1
singleton		Halovirus HGTV-1	YP_008059251.1
singleton		Halovirus HGTV-1	YP_008059252.1
singleton		Halovirus HGTV-1	YP_008059253.1
singleton		Halovirus HGTV-1	YP_008059254.1
singleton		Halovirus HGTV-1	YP_008059255.1
singleton		Halovirus HGTV-1	YP_008059256.1
singleton		Halovirus HGTV-1	YP_008059259.1
singleton		Halovirus HGTV-1	YP_008059260.1
singleton		Halovirus HGTV-1	YP_008059261.1
singleton		Halovirus HGTV-1	YP_008059262.1
singleton		Halovirus HGTV-1	YP_008059263.1
singleton		Halovirus HGTV-1	YP_008059264.1
singleton		Halovirus HGTV-1	YP_008059265.1
singleton		Halovirus HGTV-1	YP_008059266.1
singleton		Halovirus HGTV-1	YP_008059267.1
singleton		Halovirus HGTV-1	YP_008059268.1
singleton		Halovirus HGTV-1	YP_008059269.1
singleton		Halovirus HGTV-1	YP_008059270.1
singleton		Halovirus HGTV-1	YP_008059272.1
singleton		Halovirus HGTV-1	YP_008059273.1
singleton		Halovirus HGTV-1	YP_008059274.1
singleton		Halovirus HGTV-1	YP_008059275.1
singleton		Halovirus HGTV-1	YP_008059277.1
singleton		Halovirus HGTV-1	YP_008059278.1
singleton		Halovirus HGTV-1	YP_008059279.1
singleton		Halovirus HGTV-1	YP_008059281.1
singleton		Halovirus HGTV-1	YP_008059285.1
singleton		Halovirus HGTV-1	YP_008059286.1
singleton		Halovirus HGTV-1	YP_008059287.1
singleton		Halovirus HGTV-1	YP_008059288.1
singleton		Halovirus HGTV-1	YP_008059289.1
singleton		Halovirus HGTV-1	YP_008059290.1
singleton		Halovirus HGTV-1	YP_008059291.1
singleton		Halovirus HGTV-1	YP_008059292.1
singleton		Halovirus HGTV-1	YP_008059294.1
singleton		Halovirus HGTV-1	YP_008059295.1
singleton		Halovirus HGTV-1	YP_008059296.1
singleton		Halovirus HGTV-1	YP_008059297.1
singleton		Halovirus HGTV-1	YP_008059299.1
singleton		Halovirus HGTV-1	YP_008059301.1
singleton		Halovirus HGTV-1	YP_008059303.1
singleton		Halovirus HGTV-1	YP_008059306.1
singleton		Halovirus HGTV-1	YP_008059308.1
singleton		Halovirus HGTV-1	YP_008059309.1
singleton		Halovirus HGTV-1	YP_008059310.1
singleton		Halovirus HGTV-1	YP_008059311.1
singleton		Halovirus HGTV-1	YP_008059312.1
singleton		Halovirus HGTV-1	YP_008059313.1
singleton		Halovirus HGTV-1	YP_008059314.1
singleton		Halovirus HGTV-1	YP_008059317.1
singleton		Halovirus HGTV-1	YP_008059319.1
singleton		Halovirus HGTV-1	YP_008059320.1
singleton		Halovirus HGTV-1	YP_008059321.1
singleton		Halovirus HGTV-1	YP_008059322.1
singleton		Halovirus HGTV-1	YP_008059323.1
singleton		Halovirus HGTV-1	YP_008059324.1
singleton		Halovirus HGTV-1	YP_008059325.1
singleton		Halovirus HGTV-1	YP_008059326.1
singleton		Halovirus HGTV-1	YP_008059327.1
singleton		Halovirus HGTV-1	YP_008059329.1
singleton		Halovirus HGTV-1	YP_008059330.1
singleton		Halovirus HGTV-1	YP_008059331.1
singleton		Halovirus HGTV-1	YP_008059332.1
singleton		Halovirus HGTV-1	YP_008059333.1
singleton		Halovirus HGTV-1	YP_008059334.1
singleton		Halovirus HGTV-1	YP_008059335.1
singleton		Halovirus HGTV-1	YP_008059336.1
singleton		Halovirus HGTV-1	YP_008059337.1
singleton		Halovirus HGTV-1	YP_008059339.1
singleton		Halovirus HGTV-1	YP_008059340.1
singleton		Halovirus HGTV-1	YP_008059343.1
singleton		Halovirus HGTV-1	YP_008059344.1
singleton		Halovirus HGTV-1	YP_008059345.1
singleton		Halovirus HGTV-1	YP_008059346.1
singleton		Halovirus HGTV-1	YP_008059348.1
singleton		Halovirus HGTV-1	YP_008059350.1
singleton		Halovirus HGTV-1	YP_008059351.1
singleton		Halovirus HGTV-1	YP_008059352.1
singleton		Halovirus HGTV-1	YP_008059353.1
singleton		Halovirus HGTV-1	YP_008059355.1
singleton		Halovirus HGTV-1	YP_008059356.1
singleton		Halovirus HGTV-1	YP_008059357.1
singleton		Halovirus HGTV-1	YP_008059358.1
singleton		Halovirus HGTV-1	YP_008059359.1
singleton		Halovirus HGTV-1	YP_008059360.1
singleton		Halovirus HGTV-1	YP_008059361.1
singleton		Halovirus HGTV-1	YP_008059362.1
singleton		Halovirus HGTV-1	YP_008059363.1
singleton		Halovirus HGTV-1	YP_008059364.1
singleton		Halovirus HGTV-1	YP_008059365.1
singleton		Halovirus HGTV-1	YP_008059366.1
singleton		Halovirus HGTV-1	YP_008059367.1
singleton		Halovirus HGTV-1	YP_008059368.1
singleton		Halovirus HGTV-1	YP_008059369.1
singleton		Halovirus HGTV-1	YP_008059370.1
singleton		Halovirus HGTV-1	YP_008059371.1
singleton		Halovirus HGTV-1	YP_008059372.1
singleton		Halovirus HGTV-1	YP_008059373.1
singleton		Halovirus HGTV-1	YP_008059374.1
singleton		Halovirus HGTV-1	YP_008059375.1
singleton		Halovirus HGTV-1	YP_008059376.1
singleton		Halovirus HGTV-1	YP_008059377.1
singleton		Halovirus HGTV-1	YP_008059379.1
singleton		Halovirus HGTV-1	YP_008059381.1
singleton		Halovirus HGTV-1	YP_008059383.1
singleton		Halovirus HGTV-1	YP_008059384.1
singleton		Halovirus HGTV-1	YP_008059385.1
singleton		Halovirus HGTV-1	YP_008059386.1
singleton		Halovirus HGTV-1	YP_008059387.1
singleton		Halovirus HGTV-1	YP_008059388.1
singleton		Halovirus HGTV-1	YP_008059389.1
singleton		Halovirus HGTV-1	YP_008059391.1
singleton		Halovirus HGTV-1	YP_008059393.1
singleton		Halovirus HGTV-1	YP_008059394.1
singleton		Halovirus HGTV-1	YP_008059395.1
singleton		Halovirus HGTV-1	YP_008059396.1
singleton		Halovirus HGTV-1	YP_008059397.1
singleton		Halovirus HGTV-1	YP_008059399.1
singleton		Halovirus HGTV-1	YP_008059400.1
singleton		Halovirus HGTV-1	YP_008059401.1
singleton		Halovirus HGTV-1	YP_008059402.1
singleton		Halovirus HGTV-1	YP_008059403.1
singleton		Halovirus HGTV-1	YP_008059405.1
singleton		Halovirus HGTV-1	YP_008059406.1
singleton		Halovirus HGTV-1	YP_008059407.1
singleton		Halovirus HGTV-1	YP_008059408.1
singleton		Halovirus HGTV-1	YP_008059409.1
singleton		Halovirus HGTV-1	YP_008059412.1
singleton		Halovirus HGTV-1	YP_008059413.1
singleton		Halovirus HGTV-1	YP_008059414.1
singleton		Halovirus HGTV-1	YP_008059415.1
singleton		Halovirus HGTV-1	YP_008059418.1
singleton		Halovirus HGTV-1	YP_008059420.1
singleton		Halovirus HGTV-1	YP_008059422.1
singleton		Halovirus HGTV-1	YP_008059424.1
singleton		Halovirus HGTV-1	YP_008059425.1
singleton		Halovirus HGTV-1	YP_008059426.1
singleton		Halovirus HGTV-1	YP_008059427.1
singleton		Halovirus HGTV-1	YP_008059428.1
singleton		Halovirus HGTV-1	YP_008059429.1
singleton		Halovirus HGTV-1	YP_008059430.1
singleton		Halovirus HGTV-1	YP_008059432.1
singleton		Halovirus HGTV-1	YP_008059433.1
singleton		Halovirus HGTV-1	YP_008059434.1
singleton		Halovirus HGTV-1	YP_008059435.1
singleton		Halovirus HGTV-1	YP_008059436.1
singleton		Halovirus HGTV-1	YP_008059437.1
singleton		Halovirus HGTV-1	YP_008059438.1
singleton		Halovirus HGTV-1	YP_008059439.1
singleton		Halovirus HGTV-1	YP_008059440.1
singleton		Halovirus HGTV-1	YP_008059441.1
singleton		Halovirus HGTV-1	YP_008059442.1
singleton		Halovirus HGTV-1	YP_008059443.1
singleton		Halovirus HGTV-1	YP_008059444.1
singleton		Halovirus HGTV-1	YP_008059446.1
singleton		Halovirus HGTV-1	YP_008059447.1
singleton		Halovirus HGTV-1	YP_008059448.1
singleton		Halovirus HGTV-1	YP_008059449.1
singleton		Halovirus HGTV-1	YP_008059450.1
singleton		Halovirus HGTV-1	YP_008059451.1
singleton		Halovirus HGTV-1	YP_008059452.1
singleton		Halovirus HGTV-1	YP_008059453.1
singleton		Halovirus HGTV-1	YP_008059454.1
singleton		Halovirus HGTV-1	YP_008059455.1
singleton		Halovirus HGTV-1	YP_008059456.1
singleton		Halovirus HGTV-1	YP_008059457.1
singleton		Halovirus HGTV-1	YP_008059458.1
singleton		Halovirus HGTV-1	YP_008059459.1
singleton		Halovirus HGTV-1	YP_008059460.1
singleton		Halovirus HGTV-1	YP_008059461.1
singleton		Halovirus HGTV-1	YP_008059463.1
singleton		Halovirus HGTV-1	YP_008059465.1
singleton		Halovirus HGTV-1	YP_008059466.1
singleton		Halovirus HGTV-1	YP_008059467.1
singleton		Halovirus HGTV-1	YP_008059468.1
singleton		Halovirus HGTV-1	YP_008059471.1
singleton		Halovirus HGTV-1	YP_008059472.1
singleton		Halovirus HGTV-1	YP_008059474.1
singleton		Halovirus HGTV-1	YP_008059475.1
singleton		Halovirus HGTV-1	YP_008059476.1
singleton		Halovirus HGTV-1	YP_008059477.1
singleton		Halovirus HGTV-1	YP_008059478.1
singleton		Halovirus HGTV-1	YP_008059479.1
singleton		Halovirus HGTV-1	YP_008059480.1
singleton		Halovirus HGTV-1	YP_008059481.1
singleton		Halovirus HGTV-1	YP_008059482.1
singleton		Halovirus HGTV-1	YP_008059483.1
singleton		Halovirus HGTV-1	YP_008059484.1
singleton		Halovirus HGTV-1	YP_008059485.1
singleton		Halovirus HGTV-1	YP_008059486.1
singleton		Halovirus HGTV-1	YP_008059487.1
singleton		Halovirus HGTV-1	YP_008059488.1
singleton		Halovirus HGTV-1	YP_008059489.1
singleton		Halovirus HRTV-4	YP_008059490.1
singleton		Halovirus HRTV-4	YP_008059491.1
singleton		Halovirus HRTV-4	YP_008059497.1
singleton		Halovirus HRTV-4	YP_008059498.1
singleton		Halovirus HRTV-4	YP_008059499.1
singleton		Halovirus HRTV-4	YP_008059503.1
singleton		Halovirus HRTV-4	YP_008059508.1
singleton		Halovirus HRTV-4	YP_008059512.1
singleton		Halovirus HRTV-4	YP_008059513.1
singleton		Halovirus HRTV-4	YP_008059514.1
singleton		Halovirus HRTV-4	YP_008059515.1
singleton		Halovirus HRTV-4	YP_008059516.1
singleton		Halovirus HRTV-4	YP_008059517.1
singleton		Halovirus HRTV-4	YP_008059518.1
singleton		Halovirus HRTV-4	YP_008059521.1
singleton		Halovirus HRTV-4	YP_008059522.1
singleton		Halovirus HRTV-4	YP_008059523.1
singleton		Halovirus HRTV-4	YP_008059524.1
singleton		Halovirus HRTV-4	YP_008059530.1
singleton		Halovirus HRTV-4	YP_008059533.1
singleton		Halovirus HRTV-4	YP_008059540.1
singleton		Halovirus HRTV-4	YP_008059541.1
singleton		Halovirus HRTV-4	YP_008059542.1
singleton		Halovirus HRTV-4	YP_008059544.1
singleton		Halovirus HRTV-4	YP_008059545.1
singleton		Halovirus HRTV-4	YP_008059550.1
singleton		Halovirus HRTV-4	YP_008059555.1
singleton		Halovirus HRTV-4	YP_008059556.1
singleton		Halovirus HRTV-4	YP_008059560.1
singleton		Halovirus HSTV-1	YP_008083052.1
singleton		Halovirus HSTV-1	YP_008083054.1
singleton		Halovirus HSTV-1	YP_008083055.1
singleton		Halovirus HSTV-1	YP_008083056.1
singleton		Halovirus HSTV-1	YP_008083057.1
singleton		Halovirus HSTV-1	YP_008083058.1
singleton		Halovirus HSTV-1	YP_008083059.1
singleton		Halovirus HSTV-1	YP_008083060.1
singleton		Halovirus HSTV-1	YP_008083061.1
singleton		Halovirus HSTV-1	YP_008083062.1
singleton		Halovirus HSTV-1	YP_008083065.1
singleton		Halovirus HSTV-1	YP_008083067.1
singleton		Halovirus HSTV-1	YP_008083070.1
singleton		Halovirus HSTV-1	YP_008083071.1
singleton		Halovirus HSTV-1	YP_008083072.1
singleton		Halovirus HSTV-1	YP_008083073.1
singleton		Halovirus HSTV-1	YP_008083074.1
singleton		Halovirus HSTV-1	YP_008083075.1
singleton		Halovirus HSTV-1	YP_008083076.1
singleton		Halovirus HSTV-1	YP_008083077.1
singleton		Halovirus HSTV-1	YP_008083078.1
singleton		Halovirus HSTV-1	YP_008083080.1
singleton		Halovirus HSTV-1	YP_008083081.1
singleton		Halovirus HSTV-1	YP_008083082.1
singleton		Halovirus HSTV-1	YP_008083083.1
singleton		Halovirus HSTV-1	YP_008083084.1
singleton		Halovirus HSTV-1	YP_008083087.1
singleton		Halovirus HSTV-1	YP_008083088.1
singleton		Halovirus HSTV-1	YP_008083089.1
singleton		Halovirus HSTV-1	YP_008083091.1
singleton		Halovirus HSTV-1	YP_008083092.1
singleton		Halovirus HSTV-1	YP_008083093.1
singleton		Halovirus HSTV-1	YP_008083094.1
singleton		Halovirus HSTV-1	YP_008083096.1
singleton		Halovirus HSTV-1	YP_008083099.1
singleton		Halovirus HSTV-1	YP_008083100.1
singleton		Halovirus HSTV-1	YP_008083101.1
singleton		Archaeal BJ1 virus	YP_919028.1
singleton		Archaeal BJ1 virus	YP_919030.1
singleton		Archaeal BJ1 virus	YP_919031.1
singleton		Archaeal BJ1 virus	YP_919033.1
singleton		Archaeal BJ1 virus	YP_919034.1
singleton		Archaeal BJ1 virus	YP_919035.1
singleton		Archaeal BJ1 virus	YP_919038.1
singleton		Archaeal BJ1 virus	YP_919039.1
singleton		Archaeal BJ1 virus	YP_919040.1
singleton		Archaeal BJ1 virus	YP_919042.1
singleton		Archaeal BJ1 virus	YP_919044.1
singleton		Archaeal BJ1 virus	YP_919045.1
singleton		Archaeal BJ1 virus	YP_919046.1
singleton		Archaeal BJ1 virus	YP_919047.1
singleton		Archaeal BJ1 virus	YP_919049.1
singleton		Archaeal BJ1 virus	YP_919050.1
singleton		Archaeal BJ1 virus	YP_919052.1
singleton		Archaeal BJ1 virus	YP_919053.1
singleton		Archaeal BJ1 virus	YP_919054.1
singleton		Archaeal BJ1 virus	YP_919055.1
singleton		Archaeal BJ1 virus	YP_919056.1
singleton		Archaeal BJ1 virus	YP_919057.1
singleton		Archaeal BJ1 virus	YP_919058.1
singleton		Archaeal BJ1 virus	YP_919059.1
singleton		Archaeal BJ1 virus	YP_919060.1
singleton		Archaeal BJ1 virus	YP_919061.1
singleton		Archaeal BJ1 virus	YP_919063.1
singleton		Archaeal BJ1 virus	YP_919064.1
singleton		Archaeal BJ1 virus	YP_919065.1
singleton		Archaeal BJ1 virus	YP_919066.1
singleton		Archaeal BJ1 virus	YP_919067.1
singleton		Archaeal BJ1 virus	YP_919069.1
singleton		Archaeal BJ1 virus	YP_919071.1
singleton		Archaeal BJ1 virus	YP_919072.1
singleton		Archaeal BJ1 virus	YP_919078.1
singleton		Archaeal BJ1 virus	YP_919081.1
singleton		Archaeal BJ1 virus	YP_919084.1
singleton		Archaeal BJ1 virus	YP_919090.1
singleton		Archaeal BJ1 virus	YP_919093.1
singleton		Archaeal BJ1 virus	YP_919097.1
singleton		Halorubrum phage CGphi46	YP_008126547.1
singleton		Halorubrum phage CGphi46	YP_008126549.1
singleton		Halorubrum phage CGphi46	YP_008126550.1
singleton		Halorubrum phage CGphi46	YP_008126551.1
singleton		Halorubrum phage CGphi46	YP_008126552.1
singleton		Halorubrum phage CGphi46	YP_008126553.1
singleton		Halorubrum phage CGphi46	YP_008126554.1
singleton		Halorubrum phage CGphi46	YP_008126556.1
singleton		Halorubrum phage CGphi46	YP_008126558.1
singleton		Halorubrum phage CGphi46	YP_008126559.1
singleton		Halorubrum phage CGphi46	YP_008126560.1
singleton		Halorubrum phage CGphi46	YP_008126561.1
singleton		Halorubrum phage CGphi46	YP_008126562.1
singleton		Halorubrum phage CGphi46	YP_008126566.1
singleton		Halorubrum phage CGphi46	YP_008126567.1
singleton		Halorubrum phage CGphi46	YP_008126569.1
singleton		Halorubrum phage CGphi46	YP_008126570.1
singleton		Halorubrum phage CGphi46	YP_008126572.1
singleton		Halorubrum phage CGphi46	YP_008126573.1
singleton		Halorubrum phage CGphi46	YP_008126574.1
singleton		Halorubrum phage CGphi46	YP_008126575.1
singleton		Halorubrum phage CGphi46	YP_008126576.1
singleton		Halorubrum phage CGphi46	YP_008126581.1
singleton		Halorubrum phage CGphi46	YP_008126584.1
singleton		Natrialba phage PhiCh1	NP_665921.1
singleton		Natrialba phage PhiCh1	NP_665923.1
singleton		Natrialba phage PhiCh1	NP_665928.1
singleton		Natrialba phage PhiCh1	NP_665940.1
singleton		Natrialba phage PhiCh1	NP_665966.1
singleton		Natrialba phage PhiCh1	NP_665968.1
singleton		Natrialba phage PhiCh1	NP_665969.1
singleton		Natrialba phage PhiCh1	NP_665970.1
singleton		Natrialba phage PhiCh1	NP_665980.1
singleton		Natrialba phage PhiCh1	NP_665981.1
singleton		Natrialba phage PhiCh1	NP_665982.1
singleton		Natrialba phage PhiCh1	NP_665984.1
singleton		Natrialba phage PhiCh1	NP_665990.1
singleton		Natrialba phage PhiCh1	NP_665994.1
singleton		Natrialba phage PhiCh1	NP_665995.1
singleton		Natrialba phage PhiCh1	NP_665996.1
singleton		Natrialba phage PhiCh1	NP_665997.1
singleton		Natrialba phage PhiCh1	NP_666003.1
singleton		Natrialba phage PhiCh1	NP_666009.1
singleton		Halovirus HCTV-2	YP_008058364.1
singleton		Halovirus HCTV-2	YP_008058365.1
singleton		Halovirus HCTV-2	YP_008058368.1
singleton		Halovirus HCTV-2	YP_008058369.1
singleton		Halovirus HCTV-2	YP_008058371.1
singleton		Halovirus HCTV-2	YP_008058372.1
singleton		Halovirus HCTV-2	YP_008058374.1
singleton		Halovirus HCTV-2	YP_008058375.1
singleton		Halovirus HCTV-2	YP_008058376.1
singleton		Halovirus HCTV-2	YP_008058378.1
singleton		Halovirus HCTV-2	YP_008058379.1
singleton		Halovirus HCTV-2	YP_008058382.1
singleton		Halovirus HCTV-2	YP_008058386.1
singleton		Halovirus HCTV-2	YP_008058390.1
singleton		Halovirus HCTV-2	YP_008058391.1
singleton		Halovirus HCTV-2	YP_008058392.1
singleton		Halovirus HCTV-2	YP_008058393.1
singleton		Halovirus HCTV-2	YP_008058396.1
singleton		Halovirus HCTV-2	YP_008058410.1
singleton		Halovirus HCTV-2	YP_008058411.1
singleton		Halovirus HCTV-2	YP_008058413.1
singleton		Halovirus HCTV-2	YP_008058414.1
singleton		Halovirus HCTV-2	YP_008058415.1
singleton		Halovirus HCTV-2	YP_008058416.1
singleton		Halovirus HCTV-2	YP_008058417.1
singleton		Halovirus HCTV-2	YP_008058418.1
singleton		Halovirus HCTV-2	YP_008058419.1
singleton		Halovirus HCTV-2	YP_008058425.1
singleton		Halovirus HCTV-2	YP_008058426.1
singleton		Halovirus HCTV-2	YP_008058427.1
singleton		Halovirus HCTV-2	YP_008058428.1
singleton		Halovirus HCTV-2	YP_008058431.1
singleton		Halovirus HCTV-2	YP_008058432.1
singleton		Halovirus HCTV-2	YP_008058434.1
singleton		Halovirus HCTV-2	YP_008058435.1
singleton		Halovirus HCTV-2	YP_008058436.1
singleton		Halovirus HCTV-2	YP_008058438.1
singleton		Halovirus HCTV-2	YP_008058439.1
singleton		Halovirus HCTV-2	YP_008058440.1
singleton		Halovirus HCTV-2	YP_008058443.1
singleton		Halovirus HCTV-2	YP_008058444.1
singleton		Halovirus HCTV-2	YP_008058447.1
singleton		Halovirus HCTV-2	YP_008058448.1
singleton		Halovirus HHTV-2	YP_008060310.1
singleton		Halovirus HHTV-2	YP_008060313.1
singleton		Halovirus HHTV-2	YP_008060314.1
singleton		Halovirus HHTV-2	YP_008060315.1
singleton		Halovirus HHTV-2	YP_008060316.1
singleton		Halovirus HHTV-2	YP_008060317.1
singleton		Halovirus HHTV-2	YP_008060318.1
singleton		Halovirus HHTV-2	YP_008060320.1
singleton		Halovirus HHTV-2	YP_008060321.1
singleton		Halovirus HHTV-2	YP_008060322.1
singleton		Halovirus HHTV-2	YP_008060323.1
singleton		Halovirus HHTV-2	YP_008060324.1
singleton		Halovirus HHTV-2	YP_008060325.1
singleton		Halovirus HHTV-2	YP_008060328.1
singleton		Halovirus HHTV-2	YP_008060329.1
singleton		Halovirus HHTV-2	YP_008060333.1
singleton		Halovirus HHTV-2	YP_008060334.1
singleton		Halovirus HHTV-2	YP_008060336.1
singleton		Halovirus HHTV-2	YP_008060338.1
singleton		Halovirus HHTV-2	YP_008060349.1
singleton		Halovirus HHTV-2	YP_008060350.1
singleton		Halovirus HHTV-2	YP_008060364.1
singleton		Halovirus HHTV-2	YP_008060366.1
singleton		Halovirus HHTV-2	YP_008060367.1
singleton		Halovirus HHTV-2	YP_008060368.1
singleton		Halovirus HHTV-2	YP_008060369.1
singleton		Halovirus HHTV-2	YP_008060370.1
singleton		Halovirus HHTV-2	YP_008060376.1
singleton		Halovirus HHTV-2	YP_008060377.1
singleton		Halovirus HHTV-2	YP_008060378.1
singleton		Halovirus HHTV-2	YP_008060379.1
singleton		Halovirus HHTV-2	YP_008060380.1
singleton		Halovirus HHTV-2	YP_008060381.1
singleton		Halovirus HHTV-2	YP_008060382.1
singleton		Halovirus HHTV-2	YP_008060384.1
singleton		Halovirus HHTV-2	YP_008060386.1
singleton		Halovirus HHTV-2	YP_008060387.1
singleton		Halovirus HHTV-2	YP_008060388.1
singleton		Halovirus HHTV-2	YP_008060389.1
singleton		Halovirus HHTV-2	YP_008060393.1
singleton		Halovirus HHTV-2	YP_008060394.1
singleton		Halovirus HHTV-2	YP_008060395.1
singleton		Halovirus HHTV-2	YP_008060396.1
singleton		Halovirus HHTV-1	YP_008058692.1
singleton		Halovirus HHTV-1	YP_008058694.1
singleton		Halovirus HHTV-1	YP_008058695.1
singleton		Halovirus HHTV-1	YP_008058696.1
singleton		Halovirus HHTV-1	YP_008058697.1
singleton		Halovirus HHTV-1	YP_008058698.1
singleton		Halovirus HHTV-1	YP_008058700.1
singleton		Halovirus HHTV-1	YP_008058701.1
singleton		Halovirus HHTV-1	YP_008058703.1
singleton		Halovirus HHTV-1	YP_008058704.1
singleton		Halovirus HHTV-1	YP_008058706.1
singleton		Halovirus HHTV-1	YP_008058708.1
singleton		Halovirus HHTV-1	YP_008058709.1
singleton		Halovirus HHTV-1	YP_008058710.1
singleton		Halovirus HHTV-1	YP_008058712.1
singleton		Halovirus HHTV-1	YP_008058713.1
singleton		Halovirus HHTV-1	YP_008058714.1
singleton		Halovirus HHTV-1	YP_008058716.1
singleton		Halovirus HHTV-1	YP_008058717.1
singleton		Halovirus HHTV-1	YP_008058718.1
singleton		Halovirus HHTV-1	YP_008058719.1
singleton		Halovirus HHTV-1	YP_008058720.1
singleton		Halovirus HHTV-1	YP_008058721.1
singleton		Halovirus HHTV-1	YP_008058722.1
singleton		Halovirus HHTV-1	YP_008058723.1
singleton		Halovirus HHTV-1	YP_008058724.1
singleton		Halovirus HHTV-1	YP_008058727.1
singleton		Halovirus HHTV-1	YP_008058729.1
singleton		Halovirus HHTV-1	YP_008058730.1
singleton		Halovirus HHTV-1	YP_008058731.1
singleton		Halovirus HHTV-1	YP_008058732.1
singleton		Halovirus HHTV-1	YP_008058733.1
singleton		Halovirus HHTV-1	YP_008058734.1
singleton		Halovirus HHTV-1	YP_008058735.1
singleton		Halovirus HHTV-1	YP_008058736.1
singleton		Halovirus HHTV-1	YP_008058737.1
singleton		Halovirus HHTV-1	YP_008058738.1
singleton		Halovirus HHTV-1	YP_008058739.1
singleton		Halovirus HHTV-1	YP_008058740.1
singleton		Halovirus HHTV-1	YP_008058741.1
singleton		Halovirus HHTV-1	YP_008058743.1
singleton		Halovirus HHTV-1	YP_008058745.1
singleton		Halovirus HHTV-1	YP_008058746.1
singleton		Halovirus HHTV-1	YP_008058747.1
singleton		Halovirus HHTV-1	YP_008058749.1
singleton		Halovirus HHTV-1	YP_008058750.1
singleton		Halovirus HHTV-1	YP_008058751.1
singleton		Halovirus HHTV-1	YP_008058752.1
singleton		Halovirus HHTV-1	YP_008058753.1
singleton		Halovirus HHTV-1	YP_008058754.1
singleton		Halovirus HHTV-1	YP_008058755.1
singleton		Halovirus HHTV-1	YP_008058756.1
singleton		Halovirus HHTV-1	YP_008058758.1
singleton		Halovirus HHTV-1	YP_008058759.1
singleton		Halovirus HHTV-1	YP_008058760.1
singleton		Halovirus HHTV-1	YP_008058761.1
singleton		Halovirus HHTV-1	YP_008058762.1
singleton		Methanobacterium phage psiM2	NP_046975.1
singleton		VIRSorter_NODE_42_length_37129_cov_50_1040_ID_Drs3-gene_1
singleton		VIRSorter_NODE_42_length_37129_cov_50_1040_ID_Drs3-gene_14
singleton		VIRSorter_NODE_42_length_37129_cov_50_1040_ID_Drs3-gene_16
singleton		VIRSorter_NODE_42_length_37129_cov_50_1040_ID_Drs3-gene_17
singleton		VIRSorter_NODE_42_length_37129_cov_50_1040_ID_Drs3-gene_18
singleton		VIRSorter_NODE_42_length_37129_cov_50_1040_ID_Drs3-gene_19
singleton		VIRSorter_NODE_42_length_37129_cov_50_1040_ID_Drs3-gene_2
singleton		VIRSorter_NODE_42_length_37129_cov_50_1040_ID_Drs3-gene_20
singleton		VIRSorter_NODE_42_length_37129_cov_50_1040_ID_Drs3-gene_26
singleton		VIRSorter_NODE_42_length_37129_cov_50_1040_ID_Drs3-gene_28
singleton		VIRSorter_NODE_42_length_37129_cov_50_1040_ID_Drs3-gene_29
singleton		VIRSorter_NODE_42_length_37129_cov_50_1040_ID_Drs3-gene_3
singleton		VIRSorter_NODE_42_length_37129_cov_50_1040_ID_Drs3-gene_30
singleton		VIRSorter_NODE_42_length_37129_cov_50_1040_ID_Drs3-gene_32
singleton		VIRSorter_NODE_42_length_37129_cov_50_1040_ID_Drs3-gene_33
singleton		VIRSorter_NODE_42_length_37129_cov_50_1040_ID_Drs3-gene_34
singleton		VIRSorter_NODE_42_length_37129_cov_50_1040_ID_Drs3-gene_35
singleton		VIRSorter_NODE_42_length_37129_cov_50_1040_ID_Drs3-gene_36
singleton		VIRSorter_NODE_42_length_37129_cov_50_1040_ID_Drs3-gene_37
singleton		VIRSorter_NODE_42_length_37129_cov_50_1040_ID_Drs3-gene_38
singleton		VIRSorter_NODE_42_length_37129_cov_50_1040_ID_Drs3-gene_39
singleton		VIRSorter_NODE_42_length_37129_cov_50_1040_ID_Drs3-gene_4
singleton		VIRSorter_NODE_42_length_37129_cov_50_1040_ID_Drs3-gene_5
singleton		VIRSorter_NODE_42_length_37129_cov_50_1040_ID_Drs3-gene_6
singleton		VIRSorter_NODE_42_length_37129_cov_50_1040_ID_Drs3-gene_7
singleton		VIRSorter_NODE_42_length_37129_cov_50_1040_ID_Drs3-gene_8
singleton		VIRSorter_NODE_42_length_37129_cov_50_1040_ID_Drs3-gene_9
singleton		VIRSorter_NODE_41_length_55145_cov_50_1039_ID_ChaoS9-gene_10
singleton		VIRSorter_NODE_41_length_55145_cov_50_1039_ID_ChaoS9-gene_11
singleton		VIRSorter_NODE_41_length_55145_cov_50_1039_ID_ChaoS9-gene_12
singleton		VIRSorter_NODE_41_length_55145_cov_50_1039_ID_ChaoS9-gene_13
singleton		VIRSorter_NODE_41_length_55145_cov_50_1039_ID_ChaoS9-gene_20
singleton		VIRSorter_NODE_41_length_55145_cov_50_1039_ID_ChaoS9-gene_44
singleton		VIRSorter_NODE_41_length_55145_cov_50_1039_ID_ChaoS9-gene_46
singleton		VIRSorter_NODE_41_length_55145_cov_50_1039_ID_ChaoS9-gene_47
singleton		VIRSorter_NODE_41_length_55145_cov_50_1039_ID_ChaoS9-gene_49
singleton		VIRSorter_NODE_41_length_55145_cov_50_1039_ID_ChaoS9-gene_5
singleton		VIRSorter_NODE_41_length_55145_cov_50_1039_ID_ChaoS9-gene_53
singleton		VIRSorter_NODE_41_length_55145_cov_50_1039_ID_ChaoS9-gene_55
singleton		VIRSorter_NODE_41_length_55145_cov_50_1039_ID_ChaoS9-gene_56
singleton		VIRSorter_NODE_41_length_55145_cov_50_1039_ID_ChaoS9-gene_57
singleton		VIRSorter_NODE_41_length_55145_cov_50_1039_ID_ChaoS9-gene_58
singleton		VIRSorter_NODE_41_length_55145_cov_50_1039_ID_ChaoS9-gene_59
singleton		VIRSorter_NODE_41_length_55145_cov_50_1039_ID_ChaoS9-gene_61
singleton		VIRSorter_NODE_41_length_55145_cov_50_1039_ID_ChaoS9-gene_62
singleton		VIRSorter_NODE_41_length_55145_cov_50_1039_ID_ChaoS9-gene_63
singleton		VIRSorter_NODE_41_length_55145_cov_50_1039_ID_ChaoS9-gene_64
singleton		VIRSorter_NODE_41_length_55145_cov_50_1039_ID_ChaoS9-gene_65
singleton		VIRSorter_NODE_41_length_55145_cov_50_1039_ID_ChaoS9-gene_66
singleton		VIRSorter_NODE_41_length_55145_cov_50_1039_ID_ChaoS9-gene_67
singleton		VIRSorter_NODE_41_length_55145_cov_50_1039_ID_ChaoS9-gene_69
singleton		VIRSorter_NODE_41_length_55145_cov_50_1039_ID_ChaoS9-gene_7
singleton		VIRSorter_NODE_41_length_55145_cov_50_1039_ID_ChaoS9-gene_71
singleton		VIRSorter_NODE_41_length_55145_cov_50_1039_ID_ChaoS9-gene_72
singleton		VIRSorter_NODE_41_length_55145_cov_50_1039_ID_ChaoS9-gene_74
singleton		VIRSorter_NODE_41_length_55145_cov_50_1039_ID_ChaoS9-gene_75
singleton		VIRSorter_NODE_41_length_55145_cov_50_1039_ID_ChaoS9-gene_77
singleton		VIRSorter_NODE_41_length_55145_cov_50_1039_ID_ChaoS9-gene_78
singleton		VIRSorter_NODE_41_length_55145_cov_50_1039_ID_ChaoS9-gene_8
singleton		VIRSorter_NODE_40_length_58072_cov_50_1038_ID_phiH1-gene_20
singleton		VIRSorter_NODE_40_length_58072_cov_50_1038_ID_phiH1-gene_27
singleton		VIRSorter_NODE_40_length_58072_cov_50_1038_ID_phiH1-gene_32
singleton		VIRSorter_NODE_40_length_58072_cov_50_1038_ID_phiH1-gene_33
singleton		VIRSorter_NODE_40_length_58072_cov_50_1038_ID_phiH1-gene_4
singleton		VIRSorter_NODE_40_length_58072_cov_50_1038_ID_phiH1-gene_40
singleton		VIRSorter_NODE_40_length_58072_cov_50_1038_ID_phiH1-gene_42
singleton		VIRSorter_NODE_40_length_58072_cov_50_1038_ID_phiH1-gene_48
singleton		VIRSorter_NODE_40_length_58072_cov_50_1038_ID_phiH1-gene_49
singleton		VIRSorter_NODE_40_length_58072_cov_50_1038_ID_phiH1-gene_51
singleton		VIRSorter_NODE_40_length_58072_cov_50_1038_ID_phiH1-gene_53
singleton		VIRSorter_NODE_40_length_58072_cov_50_1038_ID_phiH1-gene_54
singleton		VIRSorter_NODE_40_length_58072_cov_50_1038_ID_phiH1-gene_59
singleton		VIRSorter_NODE_40_length_58072_cov_50_1038_ID_phiH1-gene_61
singleton		VIRSorter_NODE_40_length_58072_cov_50_1038_ID_phiH1-gene_65
singleton		VIRSorter_NODE_40_length_58072_cov_50_1038_ID_phiH1-gene_68
singleton		VIRSorter_NODE_40_length_58072_cov_50_1038_ID_phiH1-gene_75
singleton		VIRSorter_NODE_40_length_58072_cov_50_1038_ID_phiH1-gene_77
singleton		VIRSorter_NODE_40_length_58072_cov_50_1038_ID_phiH1-gene_78
singleton		VIRSorter_NODE_40_length_58072_cov_50_1038_ID_phiH1-gene_82
singleton		VIRSorter_NODE_40_length_58072_cov_50_1038_ID_phiH1-gene_90
singleton		VIRSorter_NODE_39_length_38059_cov_50_1037_ID_HFTV1-gene_10
singleton		VIRSorter_NODE_39_length_38059_cov_50_1037_ID_HFTV1-gene_11
singleton		VIRSorter_NODE_39_length_38059_cov_50_1037_ID_HFTV1-gene_12
singleton		VIRSorter_NODE_39_length_38059_cov_50_1037_ID_HFTV1-gene_15
singleton		VIRSorter_NODE_39_length_38059_cov_50_1037_ID_HFTV1-gene_20
singleton		VIRSorter_NODE_39_length_38059_cov_50_1037_ID_HFTV1-gene_22
singleton		VIRSorter_NODE_39_length_38059_cov_50_1037_ID_HFTV1-gene_24
singleton		VIRSorter_NODE_39_length_38059_cov_50_1037_ID_HFTV1-gene_28
singleton		VIRSorter_NODE_39_length_38059_cov_50_1037_ID_HFTV1-gene_3
singleton		VIRSorter_NODE_39_length_38059_cov_50_1037_ID_HFTV1-gene_30
singleton		VIRSorter_NODE_39_length_38059_cov_50_1037_ID_HFTV1-gene_31
singleton		VIRSorter_NODE_39_length_38059_cov_50_1037_ID_HFTV1-gene_32
singleton		VIRSorter_NODE_39_length_38059_cov_50_1037_ID_HFTV1-gene_33
singleton		VIRSorter_NODE_39_length_38059_cov_50_1037_ID_HFTV1-gene_34
singleton		VIRSorter_NODE_39_length_38059_cov_50_1037_ID_HFTV1-gene_38
singleton		VIRSorter_NODE_39_length_38059_cov_50_1037_ID_HFTV1-gene_43
singleton		VIRSorter_NODE_39_length_38059_cov_50_1037_ID_HFTV1-gene_47
singleton		VIRSorter_NODE_39_length_38059_cov_50_1037_ID_HFTV1-gene_48
singleton		VIRSorter_NODE_39_length_38059_cov_50_1037_ID_HFTV1-gene_49
singleton		VIRSorter_NODE_39_length_38059_cov_50_1037_ID_HFTV1-gene_5
singleton		VIRSorter_NODE_39_length_38059_cov_50_1037_ID_HFTV1-gene_51
singleton		VIRSorter_NODE_39_length_38059_cov_50_1037_ID_HFTV1-gene_52
singleton		VIRSorter_NODE_39_length_38059_cov_50_1037_ID_HFTV1-gene_54
singleton		VIRSorter_NODE_39_length_38059_cov_50_1037_ID_HFTV1-gene_55
singleton		VIRSorter_NODE_39_length_38059_cov_50_1037_ID_HFTV1-gene_59
singleton		VIRSorter_NODE_39_length_38059_cov_50_1037_ID_HFTV1-gene_6
singleton		VIRSorter_NODE_39_length_38059_cov_50_1037_ID_HFTV1-gene_61
singleton		VIRSorter_NODE_39_length_38059_cov_50_1037_ID_HFTV1-gene_64
singleton		VIRSorter_NODE_39_length_38059_cov_50_1037_ID_HFTV1-gene_65
singleton		VIRSorter_NODE_39_length_38059_cov_50_1037_ID_HFTV1-gene_68
singleton		VIRSorter_NODE_39_length_38059_cov_50_1037_ID_HFTV1-gene_7
singleton		VIRSorter_NODE_39_length_38059_cov_50_1037_ID_HFTV1-gene_8
singleton		VIRSorter_NODE_39_length_38059_cov_50_1037_ID_HFTV1-gene_9
singleton		VIRSorter_NODE_37_length_101734_cov_50_1035_ID_HVTV2-gene_118
singleton		VIRSorter_NODE_37_length_101734_cov_50_1035_ID_HVTV2-gene_83
singleton		VIRSorter_NODE_35_length_76583_cov_50_1033_ID_HSTV3-gene_46
singleton		VIRSorter_NODE_34_length_36603_cov_50_1032_ID_HRTV29-gene_1
singleton		VIRSorter_NODE_34_length_36603_cov_50_1032_ID_HRTV29-gene_11
singleton		VIRSorter_NODE_34_length_36603_cov_50_1032_ID_HRTV29-gene_13
singleton		VIRSorter_NODE_34_length_36603_cov_50_1032_ID_HRTV29-gene_14
singleton		VIRSorter_NODE_34_length_36603_cov_50_1032_ID_HRTV29-gene_15
singleton		VIRSorter_NODE_34_length_36603_cov_50_1032_ID_HRTV29-gene_17
singleton		VIRSorter_NODE_34_length_36603_cov_50_1032_ID_HRTV29-gene_2
singleton		VIRSorter_NODE_34_length_36603_cov_50_1032_ID_HRTV29-gene_25
singleton		VIRSorter_NODE_34_length_36603_cov_50_1032_ID_HRTV29-gene_26
singleton		VIRSorter_NODE_34_length_36603_cov_50_1032_ID_HRTV29-gene_27
singleton		VIRSorter_NODE_34_length_36603_cov_50_1032_ID_HRTV29-gene_28
singleton		VIRSorter_NODE_34_length_36603_cov_50_1032_ID_HRTV29-gene_29
singleton		VIRSorter_NODE_34_length_36603_cov_50_1032_ID_HRTV29-gene_33
singleton		VIRSorter_NODE_34_length_36603_cov_50_1032_ID_HRTV29-gene_37
singleton		VIRSorter_NODE_34_length_36603_cov_50_1032_ID_HRTV29-gene_38
singleton		VIRSorter_NODE_34_length_36603_cov_50_1032_ID_HRTV29-gene_39
singleton		VIRSorter_NODE_34_length_36603_cov_50_1032_ID_HRTV29-gene_42
singleton		VIRSorter_NODE_34_length_36603_cov_50_1032_ID_HRTV29-gene_43
singleton		VIRSorter_NODE_34_length_36603_cov_50_1032_ID_HRTV29-gene_54
singleton		VIRSorter_NODE_34_length_36603_cov_50_1032_ID_HRTV29-gene_60
singleton		VIRSorter_NODE_34_length_36603_cov_50_1032_ID_HRTV29-gene_65
singleton		VIRSorter_NODE_34_length_36603_cov_50_1032_ID_HRTV29-gene_7
singleton		VIRSorter_NODE_34_length_36603_cov_50_1032_ID_HRTV29-gene_70
singleton		VIRSorter_NODE_34_length_36603_cov_50_1032_ID_HRTV29-gene_71
singleton		VIRSorter_NODE_34_length_36603_cov_50_1032_ID_HRTV29-gene_8
singleton		VIRSorter_NODE_33_length_35270_cov_50_1031_ID_HRTV28-gene_10
singleton		VIRSorter_NODE_33_length_35270_cov_50_1031_ID_HRTV28-gene_11
singleton		VIRSorter_NODE_33_length_35270_cov_50_1031_ID_HRTV28-gene_12
singleton		VIRSorter_NODE_33_length_35270_cov_50_1031_ID_HRTV28-gene_14
singleton		VIRSorter_NODE_33_length_35270_cov_50_1031_ID_HRTV28-gene_16
singleton		VIRSorter_NODE_33_length_35270_cov_50_1031_ID_HRTV28-gene_17
singleton		VIRSorter_NODE_33_length_35270_cov_50_1031_ID_HRTV28-gene_18
singleton		VIRSorter_NODE_33_length_35270_cov_50_1031_ID_HRTV28-gene_19
singleton		VIRSorter_NODE_33_length_35270_cov_50_1031_ID_HRTV28-gene_20
singleton		VIRSorter_NODE_33_length_35270_cov_50_1031_ID_HRTV28-gene_21
singleton		VIRSorter_NODE_33_length_35270_cov_50_1031_ID_HRTV28-gene_22
singleton		VIRSorter_NODE_33_length_35270_cov_50_1031_ID_HRTV28-gene_23
singleton		VIRSorter_NODE_33_length_35270_cov_50_1031_ID_HRTV28-gene_24
singleton		VIRSorter_NODE_33_length_35270_cov_50_1031_ID_HRTV28-gene_25
singleton		VIRSorter_NODE_33_length_35270_cov_50_1031_ID_HRTV28-gene_26
singleton		VIRSorter_NODE_33_length_35270_cov_50_1031_ID_HRTV28-gene_27
singleton		VIRSorter_NODE_33_length_35270_cov_50_1031_ID_HRTV28-gene_28
singleton		VIRSorter_NODE_33_length_35270_cov_50_1031_ID_HRTV28-gene_3
singleton		VIRSorter_NODE_33_length_35270_cov_50_1031_ID_HRTV28-gene_30
singleton		VIRSorter_NODE_33_length_35270_cov_50_1031_ID_HRTV28-gene_31
singleton		VIRSorter_NODE_33_length_35270_cov_50_1031_ID_HRTV28-gene_32
singleton		VIRSorter_NODE_33_length_35270_cov_50_1031_ID_HRTV28-gene_33
singleton		VIRSorter_NODE_33_length_35270_cov_50_1031_ID_HRTV28-gene_34
singleton		VIRSorter_NODE_33_length_35270_cov_50_1031_ID_HRTV28-gene_36
singleton		VIRSorter_NODE_33_length_35270_cov_50_1031_ID_HRTV28-gene_37
singleton		VIRSorter_NODE_33_length_35270_cov_50_1031_ID_HRTV28-gene_38
singleton		VIRSorter_NODE_33_length_35270_cov_50_1031_ID_HRTV28-gene_39
singleton		VIRSorter_NODE_33_length_35270_cov_50_1031_ID_HRTV28-gene_4
singleton		VIRSorter_NODE_33_length_35270_cov_50_1031_ID_HRTV28-gene_40
singleton		VIRSorter_NODE_33_length_35270_cov_50_1031_ID_HRTV28-gene_41
singleton		VIRSorter_NODE_33_length_35270_cov_50_1031_ID_HRTV28-gene_42
singleton		VIRSorter_NODE_33_length_35270_cov_50_1031_ID_HRTV28-gene_43
singleton		VIRSorter_NODE_33_length_35270_cov_50_1031_ID_HRTV28-gene_44
singleton		VIRSorter_NODE_33_length_35270_cov_50_1031_ID_HRTV28-gene_45
singleton		VIRSorter_NODE_33_length_35270_cov_50_1031_ID_HRTV28-gene_47
singleton		VIRSorter_NODE_33_length_35270_cov_50_1031_ID_HRTV28-gene_5
singleton		VIRSorter_NODE_33_length_35270_cov_50_1031_ID_HRTV28-gene_50
singleton		VIRSorter_NODE_33_length_35270_cov_50_1031_ID_HRTV28-gene_51
singleton		VIRSorter_NODE_33_length_35270_cov_50_1031_ID_HRTV28-gene_52
singleton		VIRSorter_NODE_33_length_35270_cov_50_1031_ID_HRTV28-gene_53
singleton		VIRSorter_NODE_33_length_35270_cov_50_1031_ID_HRTV28-gene_54
singleton		VIRSorter_NODE_33_length_35270_cov_50_1031_ID_HRTV28-gene_56
singleton		VIRSorter_NODE_33_length_35270_cov_50_1031_ID_HRTV28-gene_59
singleton		VIRSorter_NODE_33_length_35270_cov_50_1031_ID_HRTV28-gene_6
singleton		VIRSorter_NODE_33_length_35270_cov_50_1031_ID_HRTV28-gene_60
singleton		VIRSorter_NODE_33_length_35270_cov_50_1031_ID_HRTV28-gene_61
singleton		VIRSorter_NODE_33_length_35270_cov_50_1031_ID_HRTV28-gene_62
singleton		VIRSorter_NODE_33_length_35270_cov_50_1031_ID_HRTV28-gene_63
singleton		VIRSorter_NODE_33_length_35270_cov_50_1031_ID_HRTV28-gene_7
singleton		VIRSorter_NODE_33_length_35270_cov_50_1031_ID_HRTV28-gene_70
singleton		VIRSorter_NODE_33_length_35270_cov_50_1031_ID_HRTV28-gene_8
singleton		VIRSorter_NODE_32_length_55914_cov_50_1030_ID_HRTV27-gene_1
singleton		VIRSorter_NODE_32_length_55914_cov_50_1030_ID_HRTV27-gene_10
singleton		VIRSorter_NODE_32_length_55914_cov_50_1030_ID_HRTV27-gene_100
singleton		VIRSorter_NODE_32_length_55914_cov_50_1030_ID_HRTV27-gene_101
singleton		VIRSorter_NODE_32_length_55914_cov_50_1030_ID_HRTV27-gene_102
singleton		VIRSorter_NODE_32_length_55914_cov_50_1030_ID_HRTV27-gene_103
singleton		VIRSorter_NODE_32_length_55914_cov_50_1030_ID_HRTV27-gene_104
singleton		VIRSorter_NODE_32_length_55914_cov_50_1030_ID_HRTV27-gene_105
singleton		VIRSorter_NODE_32_length_55914_cov_50_1030_ID_HRTV27-gene_107
singleton		VIRSorter_NODE_32_length_55914_cov_50_1030_ID_HRTV27-gene_109
singleton		VIRSorter_NODE_32_length_55914_cov_50_1030_ID_HRTV27-gene_110
singleton		VIRSorter_NODE_32_length_55914_cov_50_1030_ID_HRTV27-gene_111
singleton		VIRSorter_NODE_32_length_55914_cov_50_1030_ID_HRTV27-gene_112
singleton		VIRSorter_NODE_32_length_55914_cov_50_1030_ID_HRTV27-gene_113
singleton		VIRSorter_NODE_32_length_55914_cov_50_1030_ID_HRTV27-gene_13
singleton		VIRSorter_NODE_32_length_55914_cov_50_1030_ID_HRTV27-gene_15
singleton		VIRSorter_NODE_32_length_55914_cov_50_1030_ID_HRTV27-gene_17
singleton		VIRSorter_NODE_32_length_55914_cov_50_1030_ID_HRTV27-gene_18
singleton		VIRSorter_NODE_32_length_55914_cov_50_1030_ID_HRTV27-gene_2
singleton		VIRSorter_NODE_32_length_55914_cov_50_1030_ID_HRTV27-gene_22
singleton		VIRSorter_NODE_32_length_55914_cov_50_1030_ID_HRTV27-gene_26
singleton		VIRSorter_NODE_32_length_55914_cov_50_1030_ID_HRTV27-gene_32
singleton		VIRSorter_NODE_32_length_55914_cov_50_1030_ID_HRTV27-gene_35
singleton		VIRSorter_NODE_32_length_55914_cov_50_1030_ID_HRTV27-gene_37
singleton		VIRSorter_NODE_32_length_55914_cov_50_1030_ID_HRTV27-gene_38
singleton		VIRSorter_NODE_32_length_55914_cov_50_1030_ID_HRTV27-gene_39
singleton		VIRSorter_NODE_32_length_55914_cov_50_1030_ID_HRTV27-gene_42
singleton		VIRSorter_NODE_32_length_55914_cov_50_1030_ID_HRTV27-gene_43
singleton		VIRSorter_NODE_32_length_55914_cov_50_1030_ID_HRTV27-gene_44
singleton		VIRSorter_NODE_32_length_55914_cov_50_1030_ID_HRTV27-gene_47
singleton		VIRSorter_NODE_32_length_55914_cov_50_1030_ID_HRTV27-gene_5
singleton		VIRSorter_NODE_32_length_55914_cov_50_1030_ID_HRTV27-gene_51
singleton		VIRSorter_NODE_32_length_55914_cov_50_1030_ID_HRTV27-gene_52
singleton		VIRSorter_NODE_32_length_55914_cov_50_1030_ID_HRTV27-gene_53
singleton		VIRSorter_NODE_32_length_55914_cov_50_1030_ID_HRTV27-gene_57
singleton		VIRSorter_NODE_32_length_55914_cov_50_1030_ID_HRTV27-gene_59
singleton		VIRSorter_NODE_32_length_55914_cov_50_1030_ID_HRTV27-gene_64
singleton		VIRSorter_NODE_32_length_55914_cov_50_1030_ID_HRTV27-gene_65
singleton		VIRSorter_NODE_32_length_55914_cov_50_1030_ID_HRTV27-gene_66
singleton		VIRSorter_NODE_32_length_55914_cov_50_1030_ID_HRTV27-gene_67
singleton		VIRSorter_NODE_32_length_55914_cov_50_1030_ID_HRTV27-gene_68
singleton		VIRSorter_NODE_32_length_55914_cov_50_1030_ID_HRTV27-gene_73
singleton		VIRSorter_NODE_32_length_55914_cov_50_1030_ID_HRTV27-gene_76
singleton		VIRSorter_NODE_32_length_55914_cov_50_1030_ID_HRTV27-gene_77
singleton		VIRSorter_NODE_32_length_55914_cov_50_1030_ID_HRTV27-gene_78
singleton		VIRSorter_NODE_32_length_55914_cov_50_1030_ID_HRTV27-gene_79
singleton		VIRSorter_NODE_32_length_55914_cov_50_1030_ID_HRTV27-gene_8
singleton		VIRSorter_NODE_32_length_55914_cov_50_1030_ID_HRTV27-gene_82
singleton		VIRSorter_NODE_32_length_55914_cov_50_1030_ID_HRTV27-gene_83
singleton		VIRSorter_NODE_32_length_55914_cov_50_1030_ID_HRTV27-gene_84
singleton		VIRSorter_NODE_32_length_55914_cov_50_1030_ID_HRTV27-gene_85
singleton		VIRSorter_NODE_32_length_55914_cov_50_1030_ID_HRTV27-gene_86
singleton		VIRSorter_NODE_32_length_55914_cov_50_1030_ID_HRTV27-gene_88
singleton		VIRSorter_NODE_32_length_55914_cov_50_1030_ID_HRTV27-gene_90
singleton		VIRSorter_NODE_32_length_55914_cov_50_1030_ID_HRTV27-gene_92
singleton		VIRSorter_NODE_32_length_55914_cov_50_1030_ID_HRTV27-gene_93
singleton		VIRSorter_NODE_32_length_55914_cov_50_1030_ID_HRTV27-gene_94
singleton		VIRSorter_NODE_32_length_55914_cov_50_1030_ID_HRTV27-gene_95
singleton		VIRSorter_NODE_32_length_55914_cov_50_1030_ID_HRTV27-gene_98
singleton		VIRSorter_NODE_32_length_55914_cov_50_1030_ID_HRTV27-gene_99
singleton		VIRSorter_NODE_30_length_61692_cov_50_1028_ID_HRTV25-gene_1
singleton		VIRSorter_NODE_30_length_61692_cov_50_1028_ID_HRTV25-gene_101
singleton		VIRSorter_NODE_30_length_61692_cov_50_1028_ID_HRTV25-gene_102
singleton		VIRSorter_NODE_30_length_61692_cov_50_1028_ID_HRTV25-gene_103
singleton		VIRSorter_NODE_30_length_61692_cov_50_1028_ID_HRTV25-gene_104
singleton		VIRSorter_NODE_30_length_61692_cov_50_1028_ID_HRTV25-gene_105
singleton		VIRSorter_NODE_30_length_61692_cov_50_1028_ID_HRTV25-gene_106
singleton		VIRSorter_NODE_30_length_61692_cov_50_1028_ID_HRTV25-gene_107
singleton		VIRSorter_NODE_30_length_61692_cov_50_1028_ID_HRTV25-gene_108
singleton		VIRSorter_NODE_30_length_61692_cov_50_1028_ID_HRTV25-gene_109
singleton		VIRSorter_NODE_30_length_61692_cov_50_1028_ID_HRTV25-gene_110
singleton		VIRSorter_NODE_30_length_61692_cov_50_1028_ID_HRTV25-gene_111
singleton		VIRSorter_NODE_30_length_61692_cov_50_1028_ID_HRTV25-gene_112
singleton		VIRSorter_NODE_30_length_61692_cov_50_1028_ID_HRTV25-gene_12
singleton		VIRSorter_NODE_30_length_61692_cov_50_1028_ID_HRTV25-gene_14
singleton		VIRSorter_NODE_30_length_61692_cov_50_1028_ID_HRTV25-gene_2
singleton		VIRSorter_NODE_30_length_61692_cov_50_1028_ID_HRTV25-gene_20
singleton		VIRSorter_NODE_30_length_61692_cov_50_1028_ID_HRTV25-gene_21
singleton		VIRSorter_NODE_30_length_61692_cov_50_1028_ID_HRTV25-gene_22
singleton		VIRSorter_NODE_30_length_61692_cov_50_1028_ID_HRTV25-gene_26
singleton		VIRSorter_NODE_30_length_61692_cov_50_1028_ID_HRTV25-gene_3
singleton		VIRSorter_NODE_30_length_61692_cov_50_1028_ID_HRTV25-gene_30
singleton		VIRSorter_NODE_30_length_61692_cov_50_1028_ID_HRTV25-gene_35
singleton		VIRSorter_NODE_30_length_61692_cov_50_1028_ID_HRTV25-gene_39
singleton		VIRSorter_NODE_30_length_61692_cov_50_1028_ID_HRTV25-gene_41
singleton		VIRSorter_NODE_30_length_61692_cov_50_1028_ID_HRTV25-gene_42
singleton		VIRSorter_NODE_30_length_61692_cov_50_1028_ID_HRTV25-gene_49
singleton		VIRSorter_NODE_30_length_61692_cov_50_1028_ID_HRTV25-gene_5
singleton		VIRSorter_NODE_30_length_61692_cov_50_1028_ID_HRTV25-gene_50
singleton		VIRSorter_NODE_30_length_61692_cov_50_1028_ID_HRTV25-gene_51
singleton		VIRSorter_NODE_30_length_61692_cov_50_1028_ID_HRTV25-gene_53
singleton		VIRSorter_NODE_30_length_61692_cov_50_1028_ID_HRTV25-gene_54
singleton		VIRSorter_NODE_30_length_61692_cov_50_1028_ID_HRTV25-gene_55
singleton		VIRSorter_NODE_30_length_61692_cov_50_1028_ID_HRTV25-gene_57
singleton		VIRSorter_NODE_30_length_61692_cov_50_1028_ID_HRTV25-gene_58
singleton		VIRSorter_NODE_30_length_61692_cov_50_1028_ID_HRTV25-gene_60
singleton		VIRSorter_NODE_30_length_61692_cov_50_1028_ID_HRTV25-gene_63
singleton		VIRSorter_NODE_30_length_61692_cov_50_1028_ID_HRTV25-gene_65
singleton		VIRSorter_NODE_30_length_61692_cov_50_1028_ID_HRTV25-gene_68
singleton		VIRSorter_NODE_30_length_61692_cov_50_1028_ID_HRTV25-gene_69
singleton		VIRSorter_NODE_30_length_61692_cov_50_1028_ID_HRTV25-gene_71
singleton		VIRSorter_NODE_30_length_61692_cov_50_1028_ID_HRTV25-gene_76
singleton		VIRSorter_NODE_30_length_61692_cov_50_1028_ID_HRTV25-gene_79
singleton		VIRSorter_NODE_30_length_61692_cov_50_1028_ID_HRTV25-gene_80
singleton		VIRSorter_NODE_30_length_61692_cov_50_1028_ID_HRTV25-gene_82
singleton		VIRSorter_NODE_30_length_61692_cov_50_1028_ID_HRTV25-gene_83
singleton		VIRSorter_NODE_30_length_61692_cov_50_1028_ID_HRTV25-gene_85
singleton		VIRSorter_NODE_30_length_61692_cov_50_1028_ID_HRTV25-gene_86
singleton		VIRSorter_NODE_30_length_61692_cov_50_1028_ID_HRTV25-gene_87
singleton		VIRSorter_NODE_30_length_61692_cov_50_1028_ID_HRTV25-gene_88
singleton		VIRSorter_NODE_30_length_61692_cov_50_1028_ID_HRTV25-gene_89
singleton		VIRSorter_NODE_30_length_61692_cov_50_1028_ID_HRTV25-gene_9
singleton		VIRSorter_NODE_30_length_61692_cov_50_1028_ID_HRTV25-gene_90
singleton		VIRSorter_NODE_30_length_61692_cov_50_1028_ID_HRTV25-gene_91
singleton		VIRSorter_NODE_30_length_61692_cov_50_1028_ID_HRTV25-gene_92
singleton		VIRSorter_NODE_30_length_61692_cov_50_1028_ID_HRTV25-gene_93
singleton		VIRSorter_NODE_30_length_61692_cov_50_1028_ID_HRTV25-gene_94
singleton		VIRSorter_NODE_30_length_61692_cov_50_1028_ID_HRTV25-gene_96
singleton		VIRSorter_NODE_30_length_61692_cov_50_1028_ID_HRTV25-gene_97
singleton		VIRSorter_NODE_30_length_61692_cov_50_1028_ID_HRTV25-gene_99
singleton		VIRSorter_NODE_27_length_76489_cov_50_1025_ID_HRTV22-gene_1
singleton		VIRSorter_NODE_21_length_76825_cov_50_1019_ID_HRTV16-gene_53
singleton		VIRSorter_NODE_2_length_42293_cov_50_1000_ID_HATV3-gene_1
singleton		VIRSorter_NODE_2_length_42293_cov_50_1000_ID_HATV3-gene_10
singleton		VIRSorter_NODE_2_length_42293_cov_50_1000_ID_HATV3-gene_11
singleton		VIRSorter_NODE_2_length_42293_cov_50_1000_ID_HATV3-gene_12
singleton		VIRSorter_NODE_2_length_42293_cov_50_1000_ID_HATV3-gene_16
singleton		VIRSorter_NODE_2_length_42293_cov_50_1000_ID_HATV3-gene_17
singleton		VIRSorter_NODE_2_length_42293_cov_50_1000_ID_HATV3-gene_18
singleton		VIRSorter_NODE_2_length_42293_cov_50_1000_ID_HATV3-gene_19
singleton		VIRSorter_NODE_2_length_42293_cov_50_1000_ID_HATV3-gene_20
singleton		VIRSorter_NODE_2_length_42293_cov_50_1000_ID_HATV3-gene_22
singleton		VIRSorter_NODE_2_length_42293_cov_50_1000_ID_HATV3-gene_26
singleton		VIRSorter_NODE_2_length_42293_cov_50_1000_ID_HATV3-gene_28
singleton		VIRSorter_NODE_2_length_42293_cov_50_1000_ID_HATV3-gene_29
singleton		VIRSorter_NODE_2_length_42293_cov_50_1000_ID_HATV3-gene_3
singleton		VIRSorter_NODE_2_length_42293_cov_50_1000_ID_HATV3-gene_30
singleton		VIRSorter_NODE_2_length_42293_cov_50_1000_ID_HATV3-gene_31
singleton		VIRSorter_NODE_2_length_42293_cov_50_1000_ID_HATV3-gene_32
singleton		VIRSorter_NODE_2_length_42293_cov_50_1000_ID_HATV3-gene_33
singleton		VIRSorter_NODE_2_length_42293_cov_50_1000_ID_HATV3-gene_35
singleton		VIRSorter_NODE_2_length_42293_cov_50_1000_ID_HATV3-gene_36
singleton		VIRSorter_NODE_2_length_42293_cov_50_1000_ID_HATV3-gene_38
singleton		VIRSorter_NODE_2_length_42293_cov_50_1000_ID_HATV3-gene_39
singleton		VIRSorter_NODE_2_length_42293_cov_50_1000_ID_HATV3-gene_4
singleton		VIRSorter_NODE_2_length_42293_cov_50_1000_ID_HATV3-gene_40
singleton		VIRSorter_NODE_2_length_42293_cov_50_1000_ID_HATV3-gene_41
singleton		VIRSorter_NODE_2_length_42293_cov_50_1000_ID_HATV3-gene_43
singleton		VIRSorter_NODE_2_length_42293_cov_50_1000_ID_HATV3-gene_44
singleton		VIRSorter_NODE_2_length_42293_cov_50_1000_ID_HATV3-gene_45
singleton		VIRSorter_NODE_2_length_42293_cov_50_1000_ID_HATV3-gene_46
singleton		VIRSorter_NODE_2_length_42293_cov_50_1000_ID_HATV3-gene_48
singleton		VIRSorter_NODE_2_length_42293_cov_50_1000_ID_HATV3-gene_49
singleton		VIRSorter_NODE_2_length_42293_cov_50_1000_ID_HATV3-gene_5
singleton		VIRSorter_NODE_2_length_42293_cov_50_1000_ID_HATV3-gene_50
singleton		VIRSorter_NODE_2_length_42293_cov_50_1000_ID_HATV3-gene_51
singleton		VIRSorter_NODE_2_length_42293_cov_50_1000_ID_HATV3-gene_52
singleton		VIRSorter_NODE_2_length_42293_cov_50_1000_ID_HATV3-gene_53
singleton		VIRSorter_NODE_2_length_42293_cov_50_1000_ID_HATV3-gene_54
singleton		VIRSorter_NODE_2_length_42293_cov_50_1000_ID_HATV3-gene_55
singleton		VIRSorter_NODE_2_length_42293_cov_50_1000_ID_HATV3-gene_57
singleton		VIRSorter_NODE_2_length_42293_cov_50_1000_ID_HATV3-gene_58
singleton		VIRSorter_NODE_2_length_42293_cov_50_1000_ID_HATV3-gene_59
singleton		VIRSorter_NODE_2_length_42293_cov_50_1000_ID_HATV3-gene_6
singleton		VIRSorter_NODE_2_length_42293_cov_50_1000_ID_HATV3-gene_60
singleton		VIRSorter_NODE_2_length_42293_cov_50_1000_ID_HATV3-gene_62
singleton		VIRSorter_NODE_2_length_42293_cov_50_1000_ID_HATV3-gene_63
singleton		VIRSorter_NODE_2_length_42293_cov_50_1000_ID_HATV3-gene_66
singleton		VIRSorter_NODE_2_length_42293_cov_50_1000_ID_HATV3-gene_67
singleton		VIRSorter_NODE_2_length_42293_cov_50_1000_ID_HATV3-gene_7
singleton		VIRSorter_NODE_2_length_42293_cov_50_1000_ID_HATV3-gene_71
singleton		VIRSorter_NODE_2_length_42293_cov_50_1000_ID_HATV3-gene_72
singleton		VIRSorter_NODE_2_length_42293_cov_50_1000_ID_HATV3-gene_73
singleton		VIRSorter_NODE_2_length_42293_cov_50_1000_ID_HATV3-gene_74
singleton		VIRSorter_NODE_2_length_42293_cov_50_1000_ID_HATV3-gene_75
singleton		VIRSorter_NODE_2_length_42293_cov_50_1000_ID_HATV3-gene_76
singleton		VIRSorter_NODE_2_length_42293_cov_50_1000_ID_HATV3-gene_78
singleton		VIRSorter_NODE_2_length_42293_cov_50_1000_ID_HATV3-gene_79
singleton		VIRSorter_NODE_2_length_42293_cov_50_1000_ID_HATV3-gene_8
singleton		VIRSorter_NODE_2_length_42293_cov_50_1000_ID_HATV3-gene_80
singleton		VIRSorter_NODE_2_length_42293_cov_50_1000_ID_HATV3-gene_81
singleton		VIRSorter_NODE_2_length_42293_cov_50_1000_ID_HATV3-gene_82
singleton		VIRSorter_NODE_2_length_42293_cov_50_1000_ID_HATV3-gene_83
singleton		VIRSorter_NODE_2_length_42293_cov_50_1000_ID_HATV3-gene_84
singleton		VIRSorter_NODE_2_length_42293_cov_50_1000_ID_HATV3-gene_85
singleton		VIRSorter_NODE_2_length_42293_cov_50_1000_ID_HATV3-gene_86
singleton		VIRSorter_NODE_2_length_42293_cov_50_1000_ID_HATV3-gene_88
singleton		VIRSorter_NODE_2_length_42293_cov_50_1000_ID_HATV3-gene_89
singleton		VIRSorter_NODE_17_length_71109_cov_50_1015_ID_HRTV11-gene_105
singleton		VIRSorter_NODE_17_length_71109_cov_50_1015_ID_HRTV11-gene_87
singleton		VIRSorter_NODE_14_length_68583_cov_50_1012_ID_HRTV2-gene_32
singleton		VIRSorter_NODE_14_length_68583_cov_50_1012_ID_HRTV2-gene_38
singleton		VIRSorter_NODE_14_length_68583_cov_50_1012_ID_HRTV2-gene_40
singleton		VIRSorter_NODE_12_length_76502_cov_50_1010_ID_HJTV2-gene_40
singleton		VIRSorter_NODE_12_length_76502_cov_50_1010_ID_HJTV2-gene_42
singleton		VIRSorter_NODE_12_length_76502_cov_50_1010_ID_HJTV2-gene_43
singleton		VIRSorter_NODE_12_length_76502_cov_50_1010_ID_HJTV2-gene_45
singleton		VIRSorter_NODE_12_length_76502_cov_50_1010_ID_HJTV2-gene_46
singleton		VIRSorter_NODE_12_length_76502_cov_50_1010_ID_HJTV2-gene_47
singleton		VIRSorter_NODE_12_length_76502_cov_50_1010_ID_HJTV2-gene_48
singleton		VIRSorter_NODE_10_length_104011_cov_50_1008_ID_HCTV16-gene_1
singleton		VIRSorter_NODE_10_length_104011_cov_50_1008_ID_HCTV16-gene_106
singleton		VIRSorter_NODE_10_length_104011_cov_50_1008_ID_HCTV16-gene_140
singleton		VIRSorter_NODE_10_length_104011_cov_50_1008_ID_HCTV16-gene_16
singleton		VIRSorter_NODE_10_length_104011_cov_50_1008_ID_HCTV16-gene_164
singleton		VIRSorter_NODE_10_length_104011_cov_50_1008_ID_HCTV16-gene_165
singleton		VIRSorter_NODE_10_length_104011_cov_50_1008_ID_HCTV16-gene_167
singleton		VIRSorter_NODE_10_length_104011_cov_50_1008_ID_HCTV16-gene_2
singleton		VIRSorter_NODE_10_length_104011_cov_50_1008_ID_HCTV16-gene_5
singleton		VIRSorter_NODE_10_length_104011_cov_50_1008_ID_HCTV16-gene_8
singleton		VIRSorter_NODE_10_length_104011_cov_50_1008_ID_HCTV16-gene_9
singleton		VIRSorter_NODE_1_length_63010_cov_50_1111_ID_HATV2-gene_100
singleton		VIRSorter_NODE_1_length_63010_cov_50_1111_ID_HATV2-gene_101
singleton		VIRSorter_NODE_1_length_63010_cov_50_1111_ID_HATV2-gene_102
singleton		VIRSorter_NODE_1_length_63010_cov_50_1111_ID_HATV2-gene_103
singleton		VIRSorter_NODE_1_length_63010_cov_50_1111_ID_HATV2-gene_104
singleton		VIRSorter_NODE_1_length_63010_cov_50_1111_ID_HATV2-gene_105
singleton		VIRSorter_NODE_1_length_63010_cov_50_1111_ID_HATV2-gene_108
singleton		VIRSorter_NODE_1_length_63010_cov_50_1111_ID_HATV2-gene_109
singleton		VIRSorter_NODE_1_length_63010_cov_50_1111_ID_HATV2-gene_11
singleton		VIRSorter_NODE_1_length_63010_cov_50_1111_ID_HATV2-gene_110
singleton		VIRSorter_NODE_1_length_63010_cov_50_1111_ID_HATV2-gene_111
singleton		VIRSorter_NODE_1_length_63010_cov_50_1111_ID_HATV2-gene_112
singleton		VIRSorter_NODE_1_length_63010_cov_50_1111_ID_HATV2-gene_113
singleton		VIRSorter_NODE_1_length_63010_cov_50_1111_ID_HATV2-gene_114
singleton		VIRSorter_NODE_1_length_63010_cov_50_1111_ID_HATV2-gene_117
singleton		VIRSorter_NODE_1_length_63010_cov_50_1111_ID_HATV2-gene_118
singleton		VIRSorter_NODE_1_length_63010_cov_50_1111_ID_HATV2-gene_119
singleton		VIRSorter_NODE_1_length_63010_cov_50_1111_ID_HATV2-gene_12
singleton		VIRSorter_NODE_1_length_63010_cov_50_1111_ID_HATV2-gene_120
singleton		VIRSorter_NODE_1_length_63010_cov_50_1111_ID_HATV2-gene_121
singleton		VIRSorter_NODE_1_length_63010_cov_50_1111_ID_HATV2-gene_122
singleton		VIRSorter_NODE_1_length_63010_cov_50_1111_ID_HATV2-gene_123
singleton		VIRSorter_NODE_1_length_63010_cov_50_1111_ID_HATV2-gene_124
singleton		VIRSorter_NODE_1_length_63010_cov_50_1111_ID_HATV2-gene_125
singleton		VIRSorter_NODE_1_length_63010_cov_50_1111_ID_HATV2-gene_13
singleton		VIRSorter_NODE_1_length_63010_cov_50_1111_ID_HATV2-gene_14
singleton		VIRSorter_NODE_1_length_63010_cov_50_1111_ID_HATV2-gene_15
singleton		VIRSorter_NODE_1_length_63010_cov_50_1111_ID_HATV2-gene_16
singleton		VIRSorter_NODE_1_length_63010_cov_50_1111_ID_HATV2-gene_17
singleton		VIRSorter_NODE_1_length_63010_cov_50_1111_ID_HATV2-gene_19
singleton		VIRSorter_NODE_1_length_63010_cov_50_1111_ID_HATV2-gene_2
singleton		VIRSorter_NODE_1_length_63010_cov_50_1111_ID_HATV2-gene_20
singleton		VIRSorter_NODE_1_length_63010_cov_50_1111_ID_HATV2-gene_21
singleton		VIRSorter_NODE_1_length_63010_cov_50_1111_ID_HATV2-gene_22
singleton		VIRSorter_NODE_1_length_63010_cov_50_1111_ID_HATV2-gene_23
singleton		VIRSorter_NODE_1_length_63010_cov_50_1111_ID_HATV2-gene_25
singleton		VIRSorter_NODE_1_length_63010_cov_50_1111_ID_HATV2-gene_29
singleton		VIRSorter_NODE_1_length_63010_cov_50_1111_ID_HATV2-gene_3
singleton		VIRSorter_NODE_1_length_63010_cov_50_1111_ID_HATV2-gene_31
singleton		VIRSorter_NODE_1_length_63010_cov_50_1111_ID_HATV2-gene_33
singleton		VIRSorter_NODE_1_length_63010_cov_50_1111_ID_HATV2-gene_34
singleton		VIRSorter_NODE_1_length_63010_cov_50_1111_ID_HATV2-gene_35
singleton		VIRSorter_NODE_1_length_63010_cov_50_1111_ID_HATV2-gene_36
singleton		VIRSorter_NODE_1_length_63010_cov_50_1111_ID_HATV2-gene_37
singleton		VIRSorter_NODE_1_length_63010_cov_50_1111_ID_HATV2-gene_39
singleton		VIRSorter_NODE_1_length_63010_cov_50_1111_ID_HATV2-gene_4
singleton		VIRSorter_NODE_1_length_63010_cov_50_1111_ID_HATV2-gene_40
singleton		VIRSorter_NODE_1_length_63010_cov_50_1111_ID_HATV2-gene_41
singleton		VIRSorter_NODE_1_length_63010_cov_50_1111_ID_HATV2-gene_42
singleton		VIRSorter_NODE_1_length_63010_cov_50_1111_ID_HATV2-gene_43
singleton		VIRSorter_NODE_1_length_63010_cov_50_1111_ID_HATV2-gene_46
singleton		VIRSorter_NODE_1_length_63010_cov_50_1111_ID_HATV2-gene_47
singleton		VIRSorter_NODE_1_length_63010_cov_50_1111_ID_HATV2-gene_48
singleton		VIRSorter_NODE_1_length_63010_cov_50_1111_ID_HATV2-gene_49
singleton		VIRSorter_NODE_1_length_63010_cov_50_1111_ID_HATV2-gene_50
singleton		VIRSorter_NODE_1_length_63010_cov_50_1111_ID_HATV2-gene_51
singleton		VIRSorter_NODE_1_length_63010_cov_50_1111_ID_HATV2-gene_52
singleton		VIRSorter_NODE_1_length_63010_cov_50_1111_ID_HATV2-gene_53
singleton		VIRSorter_NODE_1_length_63010_cov_50_1111_ID_HATV2-gene_54
singleton		VIRSorter_NODE_1_length_63010_cov_50_1111_ID_HATV2-gene_55
singleton		VIRSorter_NODE_1_length_63010_cov_50_1111_ID_HATV2-gene_57
singleton		VIRSorter_NODE_1_length_63010_cov_50_1111_ID_HATV2-gene_58
singleton		VIRSorter_NODE_1_length_63010_cov_50_1111_ID_HATV2-gene_6
singleton		VIRSorter_NODE_1_length_63010_cov_50_1111_ID_HATV2-gene_60
singleton		VIRSorter_NODE_1_length_63010_cov_50_1111_ID_HATV2-gene_61
singleton		VIRSorter_NODE_1_length_63010_cov_50_1111_ID_HATV2-gene_62
singleton		VIRSorter_NODE_1_length_63010_cov_50_1111_ID_HATV2-gene_63
singleton		VIRSorter_NODE_1_length_63010_cov_50_1111_ID_HATV2-gene_64
singleton		VIRSorter_NODE_1_length_63010_cov_50_1111_ID_HATV2-gene_65
singleton		VIRSorter_NODE_1_length_63010_cov_50_1111_ID_HATV2-gene_67
singleton		VIRSorter_NODE_1_length_63010_cov_50_1111_ID_HATV2-gene_68
singleton		VIRSorter_NODE_1_length_63010_cov_50_1111_ID_HATV2-gene_69
singleton		VIRSorter_NODE_1_length_63010_cov_50_1111_ID_HATV2-gene_7
singleton		VIRSorter_NODE_1_length_63010_cov_50_1111_ID_HATV2-gene_70
singleton		VIRSorter_NODE_1_length_63010_cov_50_1111_ID_HATV2-gene_71
singleton		VIRSorter_NODE_1_length_63010_cov_50_1111_ID_HATV2-gene_72
singleton		VIRSorter_NODE_1_length_63010_cov_50_1111_ID_HATV2-gene_73
singleton		VIRSorter_NODE_1_length_63010_cov_50_1111_ID_HATV2-gene_74
singleton		VIRSorter_NODE_1_length_63010_cov_50_1111_ID_HATV2-gene_75
singleton		VIRSorter_NODE_1_length_63010_cov_50_1111_ID_HATV2-gene_76
singleton		VIRSorter_NODE_1_length_63010_cov_50_1111_ID_HATV2-gene_77
singleton		VIRSorter_NODE_1_length_63010_cov_50_1111_ID_HATV2-gene_80
singleton		VIRSorter_NODE_1_length_63010_cov_50_1111_ID_HATV2-gene_81
singleton		VIRSorter_NODE_1_length_63010_cov_50_1111_ID_HATV2-gene_82
singleton		VIRSorter_NODE_1_length_63010_cov_50_1111_ID_HATV2-gene_83
singleton		VIRSorter_NODE_1_length_63010_cov_50_1111_ID_HATV2-gene_84
singleton		VIRSorter_NODE_1_length_63010_cov_50_1111_ID_HATV2-gene_85
singleton		VIRSorter_NODE_1_length_63010_cov_50_1111_ID_HATV2-gene_86
singleton		VIRSorter_NODE_1_length_63010_cov_50_1111_ID_HATV2-gene_87
singleton		VIRSorter_NODE_1_length_63010_cov_50_1111_ID_HATV2-gene_88
singleton		VIRSorter_NODE_1_length_63010_cov_50_1111_ID_HATV2-gene_89
singleton		VIRSorter_NODE_1_length_63010_cov_50_1111_ID_HATV2-gene_9
singleton		VIRSorter_NODE_1_length_63010_cov_50_1111_ID_HATV2-gene_94
singleton		VIRSorter_NODE_1_length_63010_cov_50_1111_ID_HATV2-gene_95
singleton		VIRSorter_NODE_1_length_63010_cov_50_1111_ID_HATV2-gene_96
singleton		VIRSorter_NODE_1_length_63010_cov_50_1111_ID_HATV2-gene_97
singleton		VIRSorter_NODE_1_length_63010_cov_50_1111_ID_HATV2-gene_98
singleton		VIRSorter_NODE_1_length_63010_cov_50_1111_ID_HATV2-gene_99
