# Supplementary material for: Diversity, taxonomy, and evolution of archaeal viruses of the class Caudoviricetes
Source: PLoS Biol. 2021 Nov 9;19(11):e3001442. doi: 10.1371/journal.pbio.3001442 (PMC8651126; doi:10.1371/journal.pbio.3001442)
Supplement: S7 Table — arTV, archaeal tailed virus. (XLSX) [file pbio.3001442.s010.xlsx]

## Sheet: S7_Table
S7 Table. Proviruses related to arTVs in archaeal genomes.
Viral family	Representative virus	Host	Strain origin	Accession number	Coordinates	Genome size (bp)	Integration target	Putative core sequence of attachment site	Percentage of shared genes with representative virus (E-value < 1E-5)	References
Hafunaviridae	HF1	Halorubrum depositum	Yunnan, China	NZ_VCNM01000001	655226..732900 (FGM06_RS03355 - FGM06_RS03870)	77650	tRNA-Thr	AAGCGCGTCCTTGGTAAGGACGAGA	72% (90/125)	PMID: 32276506
	HRTV-25	Haloarculaceae archaeon HSR12-1	Kulunda Steppe, Altai, Russia	CP064787	1918702..1982868 (HSR121_1998 - HSR121_2086)	64122	tRNA-Gly	ATGCGCCGGCCGGGATTTGAACCCGGGCCATGAGCTTGGAAGGCT	52.7% (59/112)	this study
		Haloterrigena salifodinae strain BOL5-1	Bolivia	NZ_CP069188	3857528..3921179 (JMJ58_RS19170 - JMJ58_RS19620)	63626	tRNA-Trp	TGGGGTCGGAGGGATTTGAACCCCCG	50% (56/112)	this study
		Halorubrum sp. LN27	China	NZ_JAEPET010000001	2404398..2470292 (JIN95_RS11685 - JIN95_RS12135)	65869	tRNA-Trp	CGGGGGTTCAAATCCCTCCGGCCCCA	49.1% (55/112)	this study
		Haloterrigena sp. SYSU A558-1	China	NZ_JABUQZ010000001	1877075..1940539 (HTZ84_RS09435 - HTZ84_RS09835)	63447	tRNA-Ala	ATGGACTCGCCGGGATTT	49.1% (55/112)	this study
		Haloferax larsenii strain CDM_5	na	NZ_FOAD01000003	139477..198791 (BMX47_RS09055 -BMX47_RS09465)	59290	tRNA-Thr	AGCCTAGGCCGGGATTTGAACCCGG	47.3% (53/112)	PMID: 30832293 and this study
		Halonotius roseus strain F9-27 F9-27-c1	Isla Cristina, Huelva, Spain	NZ_SESI01000001	477722..539346 (EWF95_RS02560 - EWF95_RS02905)	61596	tRNA-Thr	AGCCGGAGGAGGGAATTGAACCCTCGGCC	45.5% (51/112)	this study
		Natronorubrum sulfidifaciens JCM 14089	Xinjiang, China	NZ_AOHX01000026	75945..138349 (C495_RS03430 - C495_RS03770)	62386	tRNA-Thr	AGCCGGTGGAGGGATTTGA	37.5% (42/112)	this study
		Natronorubrum bangense	Tibet, China	NZ_AOHY01000016	187210..248703 (C494_RS20510 - C494_RS07690)	64471	tRNA-Trp	GGGTTCAAATCCCTCCGACCCCA	36.6% (41/112)	this study
	HRTV-27	Halobellus limi strain CGMCC 1.10331	China	NZ_CP031311	2167337..2226984 (DV707_RS10610 - DV707_RS10965)	59639	Intergenic	ATACCTTTC	37.2% (42/113)	this study
		Haloplanus salinus strain JCM 18368	Hainan, China	NZ_QPHM01000001	2267082..2326814 (DU504_RS11615 - DU504_RS11955)	59689	tRNA-Glu	GCCGTGAGAGGGCAATATGATTGGCCGGACTACACTATCGGAGC	36.3% (41/113)	this study
Haloferuviridae	HFTV1	Halobaculum salinum strain NJ-3-1	Xinjiang, China	NZ_CP058579	2843073..2882265 (HUG12_RS14150 - HUG12_RS14470)	39181	tRNA-Arg	GGGATTCGAACC	23.5% (16/68)	this study
	HRTV-29	Halostagnicola larsenii XH-48	Inner Mongolia, China	NZ_CP007055	1331219..1375736 (HALLA_RS06705 - HALLA_RS07045)*	>38681	Intragenic	CCGACTCGAGAT	23.9% (17/71)	this study
Graaviviridae	BJ1	Halobellus captivus strain ZY8	Yunnan, China	NZ_RDQE01000013	51794..92618 (EAO78_RS18235 - EAO78_RS14860)	40811	Intragenic	GGAAAACGGTTTCT	48.6% (34/70)	this study
		Halolamina rubra strain CBA1107	na	NZ_BBJN01000003	115..40616 (ACP95_RS00525 - ACP95_RS15470)	40482	tRNA-Met	GGCCGGGGCGGGCTCCGAAC	37.1% (26/70)	this study
		Halosimplex rubrum strain R27	Liaoning, China	NZ_CP058910	3127331..3175941 (HZS55_RS15655 - HZS55_RS15985)	48599	Intergenic	CAAAAAGGTTAT	34.3% (24/70)	this study
		Haloterrigena sp. YPL8	Yunnan, China	NZ_CP058601	617923..661097 (HYG82_RS02875 - HYG82_RS03180)	43162	tRNA-Met	TGCCCGGGGAGGG	32.8% (23/70)	this study
		Natrinema salaciae strain DSM 25055	Mediterranean Sea, Italy	NZ_FOFD01000002	151145..210084 (BMX07_RS06055 - BMX07_RS06400)	58926	Intragenic	GCGAAGACCGTGTT	31.4% (22/70)	this study
		Halosimplex halophilum strain TH32	Xinjiang, China	NZ_ML214297	908414..949361 (E3328_RS04510 - E3328_RS21775)	40936	Intergenic	CAAAAAGGTTAT	30% (21/70)	this study
		Natrinema sp. YPL30 strain YPL13	Yunnan, China	NZ_CP059154	3045189..3102001 (HYG81_RS14955 - HYG81_RS15300)	56802	Intergenic	AAGTAACTTCT	30% (21/70)	this study
		Halorussus salinus strain YJ-37-H	Guangdong, China	NZ_ML974128	616303..656567 (EPL00_RS11185 - EPL00_RS11455)	40250	tRNA-Thr	TCCCACCCCTGGCTT	28.6% (20/70)	this study
		Halorubellus sp. JP-L1	Heilongjiang, China	NZ_JAAOIR010000001	493624..533989 (G9C85_RS02460 - G9C85_RS02750)	40352	tRNA-Thr	AAGCCAGGAGGGGG	28.6% (20/70)	this study
		Natronobacterium gregoryi SP2	Kenya	NC_019792	3384610..3443237 (NATGR_RS16585 - NATGR_RS16925)	58614	tRNA-Thr	CCCTGCCCTGGCTT	28.6% (20/70)	this study
		Natrinema sp. CBA1119	South Korea	NZ_PDBS01000001	1763699..1804749 (CP556_RS08605 - CP556_RS08830)	41038	tRNA-Cys	CCGGCCCTTGGCT	28.6% (20/70)	this study
		Halopiger salifodinae strain CGMCC 1.12284	na	NZ_FOIS01000003	124945..181700 (BMY29_RS10655 - BMY29_RS10970)	56743	tRNA-Thr	AGCCGGTGGAGGG	28.6% (20/70)	this study
		Halosimplex pelagicum strain R2	Liaoning, China	NZ_CP058909	914000..958148 (HZS54_RS04595 - HZS54_RS04915)	44131	tRNA-Cys	AAATCCGGCCCTTGGCTT	28.6% (20/70)	this study
		Halomicroarcula amylolytica strain LR21	Yunnan, China	NZ_SRIF01000001	786796..826689 (E4S61_RS04040 - E4S61_RS04295)	39881	Intergenic	GCAAAAAGGTTAT	27.1% (19/70)	this study
		Haloarcula sp. Atlit-120R	Atlit, Israel	NZ_QPLN01000001	273371..314753 (DVK01_RS01435 - DVK01_RS01685)	41369	tRNA-Met	GCCCTCCCCGGGCA	25.7% (18/70)	this study
Vertoviridae	phiCh1	Haloarcula quadrata strain DSM 11927	Sinai, Egypt	NZ_RBWW01000001	2485250..2551100 (BDK61_RS12720 - BDK61_RS13130)	65837	tRNA-Met	GCCCTCCCCGGGCA	34% (32/94)	PMID: 30832293 and this study
	ChaoS9	Halanaeroarchaeum sulfurireducens strain M27-SA2	Mediterranean Sea	NZ_CP011564	1927125..1970976 (HLASA_RS09790 - HLASA_RS10020)	43838	tRNA-Cys	AGCCAAGGGCCGGA	34.9% (29/83)	PMID: 30832293
		Haloarchaeon 3A1-DGR strain 3A1-DGR	Gujarat, India	NZ_KK033114	1476043..1520418 (F876_RS0207510 - F876_RS0207800)	44353	tRNA-Met	GTTCGGAGCCCGCCCCGGCCATT	21.7% (18/83)	PMID: 30832293
Leisingerviridae	psiM2	Methanothermobacter wolfeii (provirus psiM100)	Germany	AF301375	1514..30311	28781	Intergenic	TTTATTATTAAAAATTT	96.8% (30/31)	PMID: 11544247
		Methanothermobacter sp. THM-1	Seoul, South Korea	NZ_CP044013	1493241..1518755 (FZP57_RS07770 - FZP57_RS07935)	25498	Intergenic	AAATTTTTAATAATAAA	87.1% (27/31)	this study
Anaerodiviridae	Drs3	Methanobacterium formicicum strain BRM9	New Zealand (rumen)	NZ_CP006933	1690838..1727419 (BRM9_RS08310 - BRM9_RS08520)	36571	Intergenic	ACACAACAAAA	35.9% (14/39)	this study
		Methanobrevibacter wolinii	na	NZ_KK211376	183315..221216 (T523_RS05975 - T523_RS08885)	37889	Intergenic	TATAGTATTTAAA	33.3% (13/39)	this study
		Methanobrevibacter ruminantium M1	na (bovine rumen)	NC_013790	404331..454331 (MRU_RS01365 - MRU_RS01645)	49991	Intergenic	TCATATTATA	30.8% (12/39)	this study
		Methanobrevibacter smithii TS147C	USA (human faeces)	NZ_AELT01000015	95198..135543 (METSMITS147C_RS0107555 - METSMITS147C_RS0107845)	40331	Intragenic	CATACTTGACATGGT	28.2% (11/39)	this study
		Methanobrevibacter gottschalkii strain DSM 11978	USA (pig faeces)	NZ_FOAK01000003	75912..112988 (BMX72_RS03030 - BMX72_RS09640)	37065	Intergenic	AATATTATTTAT	25.6% (10/39)	this study
na, not available
*, containing 5837-bp-duplicated region, which contains the cutting site to generate circularly permuted, terminally redudant genome with headful packaging mechanism.
